# Supplementary material for: Assessing the Feasibility of Augmenting Fall Detection Systems by Relying on UWB-Based Position Tracking and a Home Robot
Source: Sensors (Basel). 2020 Sep 18;20(18):5361. doi: 10.3390/s20185361 (PMC7570467; doi:10.3390/s20185361)
Supplement: Supplementary file 1 [file sensors-20-05361-s001.zip]

Archive with 23 entries (20 files):
- sensors-882124 Supplementary Materials xml/
- sensors-882124 Supplementary Materials xml/Definitions/
- sensors-882124 Supplementary Materials xml/Definitions/chicago2.bst
- sensors-882124 Supplementary Materials xml/Definitions/journalnames.tex
- sensors-882124 Supplementary Materials xml/Definitions/logo-ccby-eps-converted-to.pdf
- sensors-882124 Supplementary Materials xml/Definitions/logo-ccby.eps
- sensors-882124 Supplementary Materials xml/Definitions/logo-mdpi-eps-converted-to.pdf
- sensors-882124 Supplementary Materials xml/Definitions/logo-mdpi.eps
- sensors-882124 Supplementary Materials xml/Definitions/logo-orcid-eps-converted-to.pdf
- sensors-882124 Supplementary Materials xml/Definitions/logo-orcid.eps
- sensors-882124 Supplementary Materials xml/Definitions/logo-updates.pdf
- sensors-882124 Supplementary Materials xml/Definitions/mdpi.bst
- sensors-882124 Supplementary Materials xml/Definitions/mdpi.cls
- sensors-882124 Supplementary Materials xml/Definitions/sensors-logo-eps-converted-to.pdf
- sensors-882124 Supplementary Materials xml/Definitions/sensors-logo.eps
- sensors-882124 Supplementary Materials xml/imm/
- sensors-882124 Supplementary Materials xml/imm/positioning2.pdf
- sensors-882124 Supplementary Materials xml/supplementary-xml.aux
- sensors-882124 Supplementary Materials xml/supplementary-xml.log
- sensors-882124 Supplementary Materials xml/supplementary-xml.out
- sensors-882124 Supplementary Materials xml/supplementary-xml.pdf
- sensors-882124 Supplementary Materials xml/supplementary-xml.synctex.gz
- sensors-882124 Supplementary Materials xml/supplementary-xml.tex
