# Supplementary material for: Assessing the Feasibility of Augmenting Fall Detection Systems by Relying on UWB-Based Position Tracking and a Home Robot
Source: Sensors (Basel). 2020 Sep 18;20(18):5361. doi: 10.3390/s20185361 (PMC7570467; doi:10.3390/s20185361)
Supplement: Supplementary file 1 [file sensors-20-05361-s001.zip › sensors-882124 Supplementary Materials xml/supplementary-xml.aux]

\relax 
\providecommand\hyper@newdestlabel[2]{}
\bibstyle{Definitions/mdpi}
\providecommand\HyperFirstAtBeginDocument{\AtBeginDocument}
\HyperFirstAtBeginDocument{\ifx\hyper@anchor\@undefined
\global\let\oldcontentsline\contentsline
\gdef\contentsline#1#2#3#4{\oldcontentsline{#1}{#2}{#3}}
\global\let\oldnewlabel\newlabel
\gdef\newlabel#1#2{\newlabelxx{#1}#2}
\gdef\newlabelxx#1#2#3#4#5#6{\oldnewlabel{#1}{{#2}{#3}}}
\AtEndDocument{\ifx\hyper@anchor\@undefined
\let\contentsline\oldcontentsline
\let\newlabel\oldnewlabel
\fi}
\fi}
\global\let\hyper@last\relax 
\gdef\HyperFirstAtBeginDocument#1{#1}
\providecommand\HyField@AuxAddToFields[1]{}
\providecommand\HyField@AuxAddToCoFields[2]{}
\citation{uwb_pos}
\citation{uwb_comp}
\citation{4575035}
\citation{IR-1,IR-2,IR-3,ANALOGIRUWB}
\citation{crepaldi}
\citation{DSD2013,DATE2015}
\citation{CROC,CADET}
\citation{BIOCAS2017}
\citation{fcc}
\@writefile{toc}{\contentsline {section}{\numberline {1}Supplementary Materials}{1}{section.1}}
\newlabel{BG}{{1}{1}{Supplementary Materials}{section.1}{}}
\@writefile{toc}{\contentsline {subsection}{\numberline {1.1}Ultra-Wide Band (UWB)}{1}{subsection.1.1}}
\@writefile{toc}{\contentsline {subsection}{\numberline {1.2}Localization Problem}{1}{subsection.1.2}}
\newlabel{loc_prob}{{1.2}{1}{Localization Problem}{subsection.1.2}{}}
\@writefile{lof}{\contentsline {figure}{\numberline {S1}{\ignorespaces Trilateration technique. (left) In the ideal case where the ranges have no uncertainty, and the intersection results in the tag coordinate (red dot). In the real case, the measurements are affected by uncertainty, and the intersection is represented by a surface of points (red area). (right) To minimize the error, the Two Way Ranging (TWR) protocol is applied where the anchor and tag exchange multiple\nobreakspace  {}messages. \relax }}{2}{figure.caption.1}}
\providecommand*\caption@xref[2]{\@setref\relax\@undefined{#1}}
\newlabel{fig:pos}{{S1}{2}{Trilateration technique. (left) In the ideal case where the ranges have no uncertainty, and the intersection results in the tag coordinate (red dot). In the real case, the measurements are affected by uncertainty, and the intersection is represented by a surface of points (red area). (right) To minimize the error, the Two Way Ranging (TWR) protocol is applied where the anchor and tag exchange multiple~messages. \relax }{figure.caption.1}{}}
\newlabel{key4}{{1}{2}{Localization Problem}{equation.1.1}{}}
\newlabel{key3}{{2}{2}{Localization Problem}{equation.1.2}{}}
\citation{DecaRange_TREK1000,DecaRangeRTLS_ARM}
\citation{tsls}
\newlabel{key}{{3}{3}{Localization Problem}{equation.1.3}{}}
\newlabel{key2}{{4}{3}{Localization Problem}{equation.1.4}{}}
\@writefile{toc}{\contentsline {subsection}{\numberline {1.3}Taylor Series-Based Least Square Algorithm (TSLS)}{3}{subsection.1.3}}
\newlabel{TSLS}{{1.3}{3}{Taylor Series-Based Least Square Algorithm (TSLS)}{subsection.1.3}{}}
\newlabel{Eq:DistEuc}{{5}{3}{Taylor Series-Based Least Square Algorithm (TSLS)}{equation.1.5}{}}
\newlabel{Eq:Error}{{6}{3}{Taylor Series-Based Least Square Algorithm (TSLS)}{equation.1.6}{}}
\newlabel{Eq:Coord}{{7}{3}{Taylor Series-Based Least Square Algorithm (TSLS)}{equation.1.7}{}}
\newlabel{Eq:Coord2}{{8}{3}{Taylor Series-Based Least Square Algorithm (TSLS)}{equation.1.8}{}}
\newlabel{Eq:DistEuc2}{{9}{3}{Taylor Series-Based Least Square Algorithm (TSLS)}{equation.1.9}{}}
\citation{vicon}
\bibcite{uwb_pos}{{1}{March 27, 2014}{{Yavari and Nickerson}}{{}}}
\newlabel{Eq:FinalResidual}{{14}{4}{Taylor Series-Based Least Square Algorithm (TSLS)}{equation.1.14}{}}
\newlabel{Eq:Correction}{{15}{4}{Taylor Series-Based Least Square Algorithm (TSLS)}{equation.1.15}{}}
\@writefile{toc}{\contentsline {subsubsection}{\numberline {1.3.1}Camera-based Motion Capture System}{4}{subsubsection.1.3.1}}
\bibcite{uwb_comp}{{2}{2015}{{{Wang} \em  {et~al.}}}{{{Wang}, {Raja}, and {Pang}}}}
\bibcite{4575035}{{3}{2008}{{{Sani} \em  {et~al.}}}{{{Sani}, {Alomainy}, {Santas}, and {Yang Hao}}}}
\bibcite{IR-1}{{4}{2010}{{Bunin}}{{}}}
\bibcite{IR-2}{{5}{2010}{{{Gentner} \em  {et~al.}}}{{{Gentner}, {Hilton}, {Beach}, and {Mecklenbr\IeC {\"a}uker}}}}
\bibcite{IR-3}{{6}{2010}{{{Sereewattanapong} and {Promwong}}}{{}}}
\bibcite{ANALOGIRUWB}{{7}{2015}{{{Crepaldi} \em  {et~al.}}}{{{Crepaldi}, {Stoppa}, {Motto Ros}, and {Demarchi}}}}
\bibcite{crepaldi}{{8}{2014}{{{Crepaldi} \em  {et~al.}}}{{{Crepaldi}, {Ros}, {Bonanno}, {Morello}, and {Demarchi}}}}
\bibcite{DSD2013}{{9}{2013}{{{Motto Ros} \em  {et~al.}}}{{{Motto Ros}, {Crepaldi}, {Bonanno}, and {Demarchi}}}}
\bibcite{DATE2015}{{10}{2015}{{{Shahshahani} \em  {et~al.}}}{{{Shahshahani}, {Shahshahani}, {Motto Ros}, {Bonanno}, {Crepaldi}, {Martina}, {Demarchi}, and {Masera}}}}
\bibcite{CROC}{{11}{2017}{{{Damilano} \em  {et~al.}}}{{{Damilano}, {Motto Ros}, {Sanginario}, {Chiolerio}, {Bocchini}, {Roppolo}, {Pirri}, {Carrara}, {Demarchi}, and {Crepaldi}}}}
\bibcite{CADET}{{12}{2016}{{{Stoppa} \em  {et~al.}}}{{{Stoppa}, {Ros}, {Crepaldi}, {Chiolerio}, and {Demarche}}}}
\bibcite{BIOCAS2017}{{13}{2017}{{{Motto Ros} \em  {et~al.}}}{{{Motto Ros}, {Miccoli}, {Sanginario}, and {Demarchi}}}}
\bibcite{fcc}{{14}{2004}{{fcc}}{{}}}
\bibcite{DecaRange_TREK1000}{{15}{2016}{{Dec}}{{}}}
\bibcite{DecaRangeRTLS_ARM}{{16}{2015}{{Dec}}{{}}}
\bibcite{tsls}{{17}{2008}{{{Yu} \em  {et~al.}}}{{{Yu}, {Guo}, and {Oppermann}}}}
\bibcite{vicon}{{18}{(accessed August 7, 2020}{{Vicon}}{{)}}}
\@writefile{toc}{\contentsline {section}{References}{5}{subsubsection.1.3.1}}
\newlabel{LastPage}{{}{6}{}{page.6}{}}
\xdef\lastpage@lastpage{6}
\xdef\lastpage@lastpageHy{6}
\expandafter\ifx\csname c@page@totc\endcsname\relax\newcounter{page@totc}\fi\setcounter{page@totc}{7}
