# Supplementary material for: Assessing the Feasibility of Augmenting Fall Detection Systems by Relying on UWB-Based Position Tracking and a Home Robot
Source: Sensors (Basel). 2020 Sep 18;20(18):5361. doi: 10.3390/s20185361 (PMC7570467; doi:10.3390/s20185361)
Supplement: Supplementary file 1 [file sensors-20-05361-s001.zip › sensors-882124 Supplementary Materials xml/supplementary-xml.log]

This is pdfTeX, Version 3.14159265-2.6-1.40.18 (TeX Live 2017/W32TeX) (preloaded format=pdflatex 2020.2.25)  18 SEP 2020 18:06
entering extended mode
 restricted \write18 enabled.
 %&-line parsing enabled.
**./supplementary-xml.tex
(./supplementary-xml.tex
LaTeX2e <2017-04-15>
Babel <3.10> and hyphenation patterns for 84 language(s) loaded.
(./Definitions/mdpi.cls
Document Class: Definitions/mdpi 08/17/2020 MDPI paper class
(c:/texlive/2017/texmf-dist/tex/latex/base/article.cls
Document Class: article 2014/09/29 v1.4h Standard LaTeX document class
(c:/texlive/2017/texmf-dist/tex/latex/base/size10.clo
File: size10.clo 2014/09/29 v1.4h Standard LaTeX file (size option)
)
\c@part=\count79
\c@section=\count80
\c@subsection=\count81
\c@subsubsection=\count82
\c@paragraph=\count83
\c@subparagraph=\count84
\c@figure=\count85
\c@table=\count86
\abovecaptionskip=\skip41
\belowcaptionskip=\skip42
\bibindent=\dimen102
)
(c:/texlive/2017/texmf-dist/tex/latex/base/fontenc.sty
Package: fontenc 2017/04/05 v2.0i Standard LaTeX package

(c:/texlive/2017/texmf-dist/tex/latex/base/t1enc.def
File: t1enc.def 2017/04/05 v2.0i Standard LaTeX file
LaTeX Font Info:    Redeclaring font encoding T1 on input line 48.
))
(c:/texlive/2017/texmf-dist/tex/latex/base/inputenc.sty
Package: inputenc 2015/03/17 v1.2c Input encoding file
\inpenc@prehook=\toks14
\inpenc@posthook=\toks15

(c:/texlive/2017/texmf-dist/tex/latex/base/utf8.def
File: utf8.def 2017/01/28 v1.1t UTF-8 support for inputenc
Now handling font encoding OML ...
... no UTF-8 mapping file for font encoding OML
Now handling font encoding T1 ...
... processing UTF-8 mapping file for font encoding T1

(c:/texlive/2017/texmf-dist/tex/latex/base/t1enc.dfu
File: t1enc.dfu 2017/01/28 v1.1t UTF-8 support for inputenc
   defining Unicode char U+00A0 (decimal 160)
   defining Unicode char U+00A1 (decimal 161)
   defining Unicode char U+00A3 (decimal 163)
   defining Unicode char U+00AB (decimal 171)
   defining Unicode char U+00AD (decimal 173)
   defining Unicode char U+00BB (decimal 187)
   defining Unicode char U+00BF (decimal 191)
   defining Unicode char U+00C0 (decimal 192)
   defining Unicode char U+00C1 (decimal 193)
   defining Unicode char U+00C2 (decimal 194)
   defining Unicode char U+00C3 (decimal 195)
   defining Unicode char U+00C4 (decimal 196)
   defining Unicode char U+00C5 (decimal 197)
   defining Unicode char U+00C6 (decimal 198)
   defining Unicode char U+00C7 (decimal 199)
   defining Unicode char U+00C8 (decimal 200)
   defining Unicode char U+00C9 (decimal 201)
   defining Unicode char U+00CA (decimal 202)
   defining Unicode char U+00CB (decimal 203)
   defining Unicode char U+00CC (decimal 204)
   defining Unicode char U+00CD (decimal 205)
   defining Unicode char U+00CE (decimal 206)
   defining Unicode char U+00CF (decimal 207)
   defining Unicode char U+00D0 (decimal 208)
   defining Unicode char U+00D1 (decimal 209)
   defining Unicode char U+00D2 (decimal 210)
   defining Unicode char U+00D3 (decimal 211)
   defining Unicode char U+00D4 (decimal 212)
   defining Unicode char U+00D5 (decimal 213)
   defining Unicode char U+00D6 (decimal 214)
   defining Unicode char U+00D8 (decimal 216)
   defining Unicode char U+00D9 (decimal 217)
   defining Unicode char U+00DA (decimal 218)
   defining Unicode char U+00DB (decimal 219)
   defining Unicode char U+00DC (decimal 220)
   defining Unicode char U+00DD (decimal 221)
   defining Unicode char U+00DE (decimal 222)
   defining Unicode char U+00DF (decimal 223)
   defining Unicode char U+00E0 (decimal 224)
   defining Unicode char U+00E1 (decimal 225)
   defining Unicode char U+00E2 (decimal 226)
   defining Unicode char U+00E3 (decimal 227)
   defining Unicode char U+00E4 (decimal 228)
   defining Unicode char U+00E5 (decimal 229)
   defining Unicode char U+00E6 (decimal 230)
   defining Unicode char U+00E7 (decimal 231)
   defining Unicode char U+00E8 (decimal 232)
   defining Unicode char U+00E9 (decimal 233)
   defining Unicode char U+00EA (decimal 234)
   defining Unicode char U+00EB (decimal 235)
   defining Unicode char U+00EC (decimal 236)
   defining Unicode char U+00ED (decimal 237)
   defining Unicode char U+00EE (decimal 238)
   defining Unicode char U+00EF (decimal 239)
   defining Unicode char U+00F0 (decimal 240)
   defining Unicode char U+00F1 (decimal 241)
   defining Unicode char U+00F2 (decimal 242)
   defining Unicode char U+00F3 (decimal 243)
   defining Unicode char U+00F4 (decimal 244)
   defining Unicode char U+00F5 (decimal 245)
   defining Unicode char U+00F6 (decimal 246)
   defining Unicode char U+00F8 (decimal 248)
   defining Unicode char U+00F9 (decimal 249)
   defining Unicode char U+00FA (decimal 250)
   defining Unicode char U+00FB (decimal 251)
   defining Unicode char U+00FC (decimal 252)
   defining Unicode char U+00FD (decimal 253)
   defining Unicode char U+00FE (decimal 254)
   defining Unicode char U+00FF (decimal 255)
   defining Unicode char U+0100 (decimal 256)
   defining Unicode char U+0101 (decimal 257)
   defining Unicode char U+0102 (decimal 258)
   defining Unicode char U+0103 (decimal 259)
   defining Unicode char U+0104 (decimal 260)
   defining Unicode char U+0105 (decimal 261)
   defining Unicode char U+0106 (decimal 262)
   defining Unicode char U+0107 (decimal 263)
   defining Unicode char U+0108 (decimal 264)
   defining Unicode char U+0109 (decimal 265)
   defining Unicode char U+010A (decimal 266)
   defining Unicode char U+010B (decimal 267)
   defining Unicode char U+010C (decimal 268)
   defining Unicode char U+010D (decimal 269)
   defining Unicode char U+010E (decimal 270)
   defining Unicode char U+010F (decimal 271)
   defining Unicode char U+0110 (decimal 272)
   defining Unicode char U+0111 (decimal 273)
   defining Unicode char U+0112 (decimal 274)
   defining Unicode char U+0113 (decimal 275)
   defining Unicode char U+0114 (decimal 276)
   defining Unicode char U+0115 (decimal 277)
   defining Unicode char U+0116 (decimal 278)
   defining Unicode char U+0117 (decimal 279)
   defining Unicode char U+0118 (decimal 280)
   defining Unicode char U+0119 (decimal 281)
   defining Unicode char U+011A (decimal 282)
   defining Unicode char U+011B (decimal 283)
   defining Unicode char U+011C (decimal 284)
   defining Unicode char U+011D (decimal 285)
   defining Unicode char U+011E (decimal 286)
   defining Unicode char U+011F (decimal 287)
   defining Unicode char U+0120 (decimal 288)
   defining Unicode char U+0121 (decimal 289)
   defining Unicode char U+0122 (decimal 290)
   defining Unicode char U+0123 (decimal 291)
   defining Unicode char U+0124 (decimal 292)
   defining Unicode char U+0125 (decimal 293)
   defining Unicode char U+0128 (decimal 296)
   defining Unicode char U+0129 (decimal 297)
   defining Unicode char U+012A (decimal 298)
   defining Unicode char U+012B (decimal 299)
   defining Unicode char U+012C (decimal 300)
   defining Unicode char U+012D (decimal 301)
   defining Unicode char U+012E (decimal 302)
   defining Unicode char U+012F (decimal 303)
   defining Unicode char U+0130 (decimal 304)
   defining Unicode char U+0131 (decimal 305)
   defining Unicode char U+0132 (decimal 306)
   defining Unicode char U+0133 (decimal 307)
   defining Unicode char U+0134 (decimal 308)
   defining Unicode char U+0135 (decimal 309)
   defining Unicode char U+0136 (decimal 310)
   defining Unicode char U+0137 (decimal 311)
   defining Unicode char U+0139 (decimal 313)
   defining Unicode char U+013A (decimal 314)
   defining Unicode char U+013B (decimal 315)
   defining Unicode char U+013C (decimal 316)
   defining Unicode char U+013D (decimal 317)
   defining Unicode char U+013E (decimal 318)
   defining Unicode char U+0141 (decimal 321)
   defining Unicode char U+0142 (decimal 322)
   defining Unicode char U+0143 (decimal 323)
   defining Unicode char U+0144 (decimal 324)
   defining Unicode char U+0145 (decimal 325)
   defining Unicode char U+0146 (decimal 326)
   defining Unicode char U+0147 (decimal 327)
   defining Unicode char U+0148 (decimal 328)
   defining Unicode char U+014A (decimal 330)
   defining Unicode char U+014B (decimal 331)
   defining Unicode char U+014C (decimal 332)
   defining Unicode char U+014D (decimal 333)
   defining Unicode char U+014E (decimal 334)
   defining Unicode char U+014F (decimal 335)
   defining Unicode char U+0150 (decimal 336)
   defining Unicode char U+0151 (decimal 337)
   defining Unicode char U+0152 (decimal 338)
   defining Unicode char U+0153 (decimal 339)
   defining Unicode char U+0154 (decimal 340)
   defining Unicode char U+0155 (decimal 341)
   defining Unicode char U+0156 (decimal 342)
   defining Unicode char U+0157 (decimal 343)
   defining Unicode char U+0158 (decimal 344)
   defining Unicode char U+0159 (decimal 345)
   defining Unicode char U+015A (decimal 346)
   defining Unicode char U+015B (decimal 347)
   defining Unicode char U+015C (decimal 348)
   defining Unicode char U+015D (decimal 349)
   defining Unicode char U+015E (decimal 350)
   defining Unicode char U+015F (decimal 351)
   defining Unicode char U+0160 (decimal 352)
   defining Unicode char U+0161 (decimal 353)
   defining Unicode char U+0162 (decimal 354)
   defining Unicode char U+0163 (decimal 355)
   defining Unicode char U+0164 (decimal 356)
   defining Unicode char U+0165 (decimal 357)
   defining Unicode char U+0168 (decimal 360)
   defining Unicode char U+0169 (decimal 361)
   defining Unicode char U+016A (decimal 362)
   defining Unicode char U+016B (decimal 363)
   defining Unicode char U+016C (decimal 364)
   defining Unicode char U+016D (decimal 365)
   defining Unicode char U+016E (decimal 366)
   defining Unicode char U+016F (decimal 367)
   defining Unicode char U+0170 (decimal 368)
   defining Unicode char U+0171 (decimal 369)
   defining Unicode char U+0172 (decimal 370)
   defining Unicode char U+0173 (decimal 371)
   defining Unicode char U+0174 (decimal 372)
   defining Unicode char U+0175 (decimal 373)
   defining Unicode char U+0176 (decimal 374)
   defining Unicode char U+0177 (decimal 375)
   defining Unicode char U+0178 (decimal 376)
   defining Unicode char U+0179 (decimal 377)
   defining Unicode char U+017A (decimal 378)
   defining Unicode char U+017B (decimal 379)
   defining Unicode char U+017C (decimal 380)
   defining Unicode char U+017D (decimal 381)
   defining Unicode char U+017E (decimal 382)
   defining Unicode char U+01CD (decimal 461)
   defining Unicode char U+01CE (decimal 462)
   defining Unicode char U+01CF (decimal 463)
   defining Unicode char U+01D0 (decimal 464)
   defining Unicode char U+01D1 (decimal 465)
   defining Unicode char U+01D2 (decimal 466)
   defining Unicode char U+01D3 (decimal 467)
   defining Unicode char U+01D4 (decimal 468)
   defining Unicode char U+01E2 (decimal 482)
   defining Unicode char U+01E3 (decimal 483)
   defining Unicode char U+01E6 (decimal 486)
   defining Unicode char U+01E7 (decimal 487)
   defining Unicode char U+01E8 (decimal 488)
   defining Unicode char U+01E9 (decimal 489)
   defining Unicode char U+01EA (decimal 490)
   defining Unicode char U+01EB (decimal 491)
   defining Unicode char U+01F0 (decimal 496)
   defining Unicode char U+01F4 (decimal 500)
   defining Unicode char U+01F5 (decimal 501)
   defining Unicode char U+0218 (decimal 536)
   defining Unicode char U+0219 (decimal 537)
   defining Unicode char U+021A (decimal 538)
   defining Unicode char U+021B (decimal 539)
   defining Unicode char U+0232 (decimal 562)
   defining Unicode char U+0233 (decimal 563)
   defining Unicode char U+1E02 (decimal 7682)
   defining Unicode char U+1E03 (decimal 7683)
   defining Unicode char U+200C (decimal 8204)
   defining Unicode char U+2010 (decimal 8208)
   defining Unicode char U+2011 (decimal 8209)
   defining Unicode char U+2012 (decimal 8210)
   defining Unicode char U+2013 (decimal 8211)
   defining Unicode char U+2014 (decimal 8212)
   defining Unicode char U+2015 (decimal 8213)
   defining Unicode char U+2018 (decimal 8216)
   defining Unicode char U+2019 (decimal 8217)
   defining Unicode char U+201A (decimal 8218)
   defining Unicode char U+201C (decimal 8220)
   defining Unicode char U+201D (decimal 8221)
   defining Unicode char U+201E (decimal 8222)
   defining Unicode char U+2030 (decimal 8240)
   defining Unicode char U+2031 (decimal 8241)
   defining Unicode char U+2039 (decimal 8249)
   defining Unicode char U+203A (decimal 8250)
   defining Unicode char U+2423 (decimal 9251)
   defining Unicode char U+1E20 (decimal 7712)
   defining Unicode char U+1E21 (decimal 7713)
)
Now handling font encoding OT1 ...
... processing UTF-8 mapping file for font encoding OT1

(c:/texlive/2017/texmf-dist/tex/latex/base/ot1enc.dfu
File: ot1enc.dfu 2017/01/28 v1.1t UTF-8 support for inputenc
   defining Unicode char U+00A0 (decimal 160)
   defining Unicode char U+00A1 (decimal 161)
   defining Unicode char U+00A3 (decimal 163)
   defining Unicode char U+00AD (decimal 173)
   defining Unicode char U+00B8 (decimal 184)
   defining Unicode char U+00BF (decimal 191)
   defining Unicode char U+00C5 (decimal 197)
   defining Unicode char U+00C6 (decimal 198)
   defining Unicode char U+00D8 (decimal 216)
   defining Unicode char U+00DF (decimal 223)
   defining Unicode char U+00E6 (decimal 230)
   defining Unicode char U+00EC (decimal 236)
   defining Unicode char U+00ED (decimal 237)
   defining Unicode char U+00EE (decimal 238)
   defining Unicode char U+00EF (decimal 239)
   defining Unicode char U+00F8 (decimal 248)
   defining Unicode char U+0131 (decimal 305)
   defining Unicode char U+0141 (decimal 321)
   defining Unicode char U+0142 (decimal 322)
   defining Unicode char U+0152 (decimal 338)
   defining Unicode char U+0153 (decimal 339)
   defining Unicode char U+0174 (decimal 372)
   defining Unicode char U+0175 (decimal 373)
   defining Unicode char U+0176 (decimal 374)
   defining Unicode char U+0177 (decimal 375)
   defining Unicode char U+0218 (decimal 536)
   defining Unicode char U+0219 (decimal 537)
   defining Unicode char U+021A (decimal 538)
   defining Unicode char U+021B (decimal 539)
   defining Unicode char U+2013 (decimal 8211)
   defining Unicode char U+2014 (decimal 8212)
   defining Unicode char U+2018 (decimal 8216)
   defining Unicode char U+2019 (decimal 8217)
   defining Unicode char U+201C (decimal 8220)
   defining Unicode char U+201D (decimal 8221)
)
Now handling font encoding OMS ...
... processing UTF-8 mapping file for font encoding OMS

(c:/texlive/2017/texmf-dist/tex/latex/base/omsenc.dfu
File: omsenc.dfu 2017/01/28 v1.1t UTF-8 support for inputenc
   defining Unicode char U+00A7 (decimal 167)
   defining Unicode char U+00B6 (decimal 182)
   defining Unicode char U+00B7 (decimal 183)
   defining Unicode char U+2020 (decimal 8224)
   defining Unicode char U+2021 (decimal 8225)
   defining Unicode char U+2022 (decimal 8226)
)
Now handling font encoding OMX ...
... no UTF-8 mapping file for font encoding OMX
Now handling font encoding U ...
... no UTF-8 mapping file for font encoding U
   defining Unicode char U+00A9 (decimal 169)
   defining Unicode char U+00AA (decimal 170)
   defining Unicode char U+00AE (decimal 174)
   defining Unicode char U+00BA (decimal 186)
   defining Unicode char U+02C6 (decimal 710)
   defining Unicode char U+02DC (decimal 732)
   defining Unicode char U+200C (decimal 8204)
   defining Unicode char U+2026 (decimal 8230)
   defining Unicode char U+2122 (decimal 8482)
   defining Unicode char U+2423 (decimal 9251)
))
(c:/texlive/2017/texmf-dist/tex/latex/tools/calc.sty
Package: calc 2014/10/28 v4.3 Infix arithmetic (KKT,FJ)
\calc@Acount=\count87
\calc@Bcount=\count88
\calc@Adimen=\dimen103
\calc@Bdimen=\dimen104
\calc@Askip=\skip43
\calc@Bskip=\skip44
LaTeX Info: Redefining \setlength on input line 80.
LaTeX Info: Redefining \addtolength on input line 81.
\calc@Ccount=\count89
\calc@Cskip=\skip45
)
(c:/texlive/2017/texmf-dist/tex/latex/tools/indentfirst.sty
Package: indentfirst 1995/11/23 v1.03 Indent first paragraph (DPC)
)
(c:/texlive/2017/texmf-dist/tex/latex/fancyhdr/fancyhdr.sty
Package: fancyhdr 2016/09/06 3.8 Extensive control of page headers and footers
\fancy@headwidth=\skip46
\f@ncyO@elh=\skip47
\f@ncyO@erh=\skip48
\f@ncyO@olh=\skip49
\f@ncyO@orh=\skip50
\f@ncyO@elf=\skip51
\f@ncyO@erf=\skip52
\f@ncyO@olf=\skip53
\f@ncyO@orf=\skip54
)
(c:/texlive/2017/texmf-dist/tex/latex/graphics/graphicx.sty
Package: graphicx 2014/10/28 v1.0g Enhanced LaTeX Graphics (DPC,SPQR)

(c:/texlive/2017/texmf-dist/tex/latex/graphics/keyval.sty
Package: keyval 2014/10/28 v1.15 key=value parser (DPC)
\KV@toks@=\toks16
)
(c:/texlive/2017/texmf-dist/tex/latex/graphics/graphics.sty
Package: graphics 2017/04/14 v1.1b Standard LaTeX Graphics (DPC,SPQR)

(c:/texlive/2017/texmf-dist/tex/latex/graphics/trig.sty
Package: trig 2016/01/03 v1.10 sin cos tan (DPC)
)
(c:/texlive/2017/texmf-dist/tex/latex/graphics-cfg/graphics.cfg
File: graphics.cfg 2016/06/04 v1.11 sample graphics configuration
)
Package graphics Info: Driver file: pdftex.def on input line 99.

(c:/texlive/2017/texmf-dist/tex/latex/graphics-def/pdftex.def
File: pdftex.def 2017/01/12 v0.06k Graphics/color for pdfTeX

(c:/texlive/2017/texmf-dist/tex/generic/oberdiek/infwarerr.sty
Package: infwarerr 2016/05/16 v1.4 Providing info/warning/error messages (HO)
)
(c:/texlive/2017/texmf-dist/tex/generic/oberdiek/ltxcmds.sty
Package: ltxcmds 2016/05/16 v1.23 LaTeX kernel commands for general use (HO)
)
\Gread@gobject=\count90
))
\Gin@req@height=\dimen105
\Gin@req@width=\dimen106
)
(c:/texlive/2017/texmf-dist/tex/latex/oberdiek/epstopdf.sty
Package: epstopdf 2016/05/15 v2.6 Conversion with epstopdf on the fly (HO)

(c:/texlive/2017/texmf-dist/tex/latex/oberdiek/epstopdf-base.sty
Package: epstopdf-base 2016/05/15 v2.6 Base part for package epstopdf

(c:/texlive/2017/texmf-dist/tex/latex/oberdiek/grfext.sty
Package: grfext 2016/05/16 v1.2 Manage graphics extensions (HO)

(c:/texlive/2017/texmf-dist/tex/generic/oberdiek/kvdefinekeys.sty
Package: kvdefinekeys 2016/05/16 v1.4 Define keys (HO)
))
(c:/texlive/2017/texmf-dist/tex/latex/oberdiek/kvoptions.sty
Package: kvoptions 2016/05/16 v3.12 Key value format for package options (HO)

(c:/texlive/2017/texmf-dist/tex/generic/oberdiek/kvsetkeys.sty
Package: kvsetkeys 2016/05/16 v1.17 Key value parser (HO)

(c:/texlive/2017/texmf-dist/tex/generic/oberdiek/etexcmds.sty
Package: etexcmds 2016/05/16 v1.6 Avoid name clashes with e-TeX commands (HO)

(c:/texlive/2017/texmf-dist/tex/generic/oberdiek/ifluatex.sty
Package: ifluatex 2016/05/16 v1.4 Provides the ifluatex switch (HO)
Package ifluatex Info: LuaTeX not detected.
)
Package etexcmds Info: Could not find \expanded.
(etexcmds)             That can mean that you are not using pdfTeX 1.50 or
(etexcmds)             that some package has redefined \expanded.
(etexcmds)             In the latter case, load this package earlier.
)))
(c:/texlive/2017/texmf-dist/tex/generic/oberdiek/pdftexcmds.sty
Package: pdftexcmds 2017/03/19 v0.25 Utility functions of pdfTeX for LuaTeX (HO
)

(c:/texlive/2017/texmf-dist/tex/generic/oberdiek/ifpdf.sty
Package: ifpdf 2017/03/15 v3.2 Provides the ifpdf switch
)
Package pdftexcmds Info: LuaTeX not detected.
Package pdftexcmds Info: \pdf@primitive is available.
Package pdftexcmds Info: \pdf@ifprimitive is available.
Package pdftexcmds Info: \pdfdraftmode found.
)
Package epstopdf-base Info: Redefining graphics rule for `.eps' on input line 4
38.
Package grfext Info: Graphics extension search list:
(grfext)             [.png,.pdf,.jpg,.mps,.jpeg,.jbig2,.jb2,.PNG,.PDF,.JPG,.JPE
G,.JBIG2,.JB2,.eps]
(grfext)             \AppendGraphicsExtensions on input line 456.

(c:/texlive/2017/texmf-dist/tex/latex/latexconfig/epstopdf-sys.cfg
File: epstopdf-sys.cfg 2010/07/13 v1.3 Configuration of (r)epstopdf for TeX Liv
e
)))
(c:/texlive/2017/texmf-dist/tex/latex/lastpage/lastpage.sty
Package: lastpage 2015/03/29 v1.2m Refers to last page's name (HMM; JPG)
)
(c:/texlive/2017/texmf-dist/tex/latex/base/ifthen.sty
Package: ifthen 2014/09/29 v1.1c Standard LaTeX ifthen package (DPC)
)
(c:/texlive/2017/texmf-dist/tex/latex/lineno/lineno.sty
Package: lineno 2005/11/02 line numbers on paragraphs v4.41
\linenopenalty=\count91
\output=\toks17
\linenoprevgraf=\count92
\linenumbersep=\dimen107
\linenumberwidth=\dimen108
\c@linenumber=\count93
\c@pagewiselinenumber=\count94
\c@LN@truepage=\count95
\c@internallinenumber=\count96
\c@internallinenumbers=\count97
\quotelinenumbersep=\dimen109
\bframerule=\dimen110
\bframesep=\dimen111
\bframebox=\box26
LaTeX Info: Redefining \\ on input line 3056.
)
(c:/texlive/2017/texmf-dist/tex/latex/float/float.sty
Package: float 2001/11/08 v1.3d Float enhancements (AL)
\c@float@type=\count98
\float@exts=\toks18
\float@box=\box27
\@float@everytoks=\toks19
\@floatcapt=\box28
)
(c:/texlive/2017/texmf-dist/tex/latex/amsmath/amsmath.sty
Package: amsmath 2016/11/05 v2.16a AMS math features
\@mathmargin=\skip55

For additional information on amsmath, use the `?' option.
(c:/texlive/2017/texmf-dist/tex/latex/amsmath/amstext.sty
Package: amstext 2000/06/29 v2.01 AMS text

(c:/texlive/2017/texmf-dist/tex/latex/amsmath/amsgen.sty
File: amsgen.sty 1999/11/30 v2.0 generic functions
\@emptytoks=\toks20
\ex@=\dimen112
))
(c:/texlive/2017/texmf-dist/tex/latex/amsmath/amsbsy.sty
Package: amsbsy 1999/11/29 v1.2d Bold Symbols
\pmbraise@=\dimen113
)
(c:/texlive/2017/texmf-dist/tex/latex/amsmath/amsopn.sty
Package: amsopn 2016/03/08 v2.02 operator names
)
\inf@bad=\count99
LaTeX Info: Redefining \frac on input line 213.
\uproot@=\count100
\leftroot@=\count101
LaTeX Info: Redefining \overline on input line 375.
\classnum@=\count102
\DOTSCASE@=\count103
LaTeX Info: Redefining \ldots on input line 472.
LaTeX Info: Redefining \dots on input line 475.
LaTeX Info: Redefining \cdots on input line 596.
\Mathstrutbox@=\box29
\strutbox@=\box30
\big@size=\dimen114
LaTeX Font Info:    Redeclaring font encoding OML on input line 712.
LaTeX Font Info:    Redeclaring font encoding OMS on input line 713.
\macc@depth=\count104
\c@MaxMatrixCols=\count105
\dotsspace@=\muskip10
\c@parentequation=\count106
\dspbrk@lvl=\count107
\tag@help=\toks21
\row@=\count108
\column@=\count109
\maxfields@=\count110
\andhelp@=\toks22
\eqnshift@=\dimen115
\alignsep@=\dimen116
\tagshift@=\dimen117
\tagwidth@=\dimen118
\totwidth@=\dimen119
\lineht@=\dimen120
\@envbody=\toks23
\multlinegap=\skip56
\multlinetaggap=\skip57
\mathdisplay@stack=\toks24
LaTeX Info: Redefining \[ on input line 2817.
LaTeX Info: Redefining \] on input line 2818.
)
(c:/texlive/2017/texmf-dist/tex/latex/setspace/setspace.sty
Package: setspace 2011/12/19 v6.7a set line spacing
)
(c:/texlive/2017/texmf-dist/tex/latex/enumitem/enumitem.sty
Package: enumitem 2011/09/28 v3.5.2 Customized lists
\labelindent=\skip58
\enit@outerparindent=\dimen121
\enit@toks=\toks25
\enit@inbox=\box31
\enitdp@description=\count111
)
(c:/texlive/2017/texmf-dist/tex/latex/psnfss/mathpazo.sty
Package: mathpazo 2005/04/12 PSNFSS-v9.2a Palatino w/ Pazo Math (D.Puga, WaS) 
\symupright=\mathgroup4
)
(c:/texlive/2017/texmf-dist/tex/latex/booktabs/booktabs.sty
Package: booktabs 2016/04/27 v1.618033 publication quality tables
\heavyrulewidth=\dimen122
\lightrulewidth=\dimen123
\cmidrulewidth=\dimen124
\belowrulesep=\dimen125
\belowbottomsep=\dimen126
\aboverulesep=\dimen127
\abovetopsep=\dimen128
\cmidrulesep=\dimen129
\cmidrulekern=\dimen130
\defaultaddspace=\dimen131
\@cmidla=\count112
\@cmidlb=\count113
\@aboverulesep=\dimen132
\@belowrulesep=\dimen133
\@thisruleclass=\count114
\@lastruleclass=\count115
\@thisrulewidth=\dimen134
)
(c:/texlive/2017/texmf-dist/tex/latex/titlesec/titlesec.sty
Package: titlesec 2016/03/21 v2.10.2 Sectioning titles
\ttl@box=\box32
\beforetitleunit=\skip59
\aftertitleunit=\skip60
\ttl@plus=\dimen135
\ttl@minus=\dimen136
\ttl@toksa=\toks26
\titlewidth=\dimen137
\titlewidthlast=\dimen138
\titlewidthfirst=\dimen139
)
(c:/texlive/2017/texmf-dist/tex/latex/etoolbox/etoolbox.sty
Package: etoolbox 2017/01/02 v2.4 e-TeX tools for LaTeX (JAW)
\etb@tempcnta=\count116
)
(c:/texlive/2017/texmf-dist/tex/latex/tabto-ltx/tabto.sty
Package: tabto 2013/03/25  v 1.3  Another tabbing mechanism
\CurrentLineWidth=\dimen140
)
(c:/texlive/2017/texmf-dist/tex/latex/xcolor/xcolor.sty
Package: xcolor 2016/05/11 v2.12 LaTeX color extensions (UK)

(c:/texlive/2017/texmf-dist/tex/latex/graphics-cfg/color.cfg
File: color.cfg 2016/01/02 v1.6 sample color configuration
)
Package xcolor Info: Driver file: pdftex.def on input line 225.

(c:/texlive/2017/texmf-dist/tex/latex/colortbl/colortbl.sty
Package: colortbl 2012/02/13 v1.0a Color table columns (DPC)

(c:/texlive/2017/texmf-dist/tex/latex/tools/array.sty
Package: array 2016/10/06 v2.4d Tabular extension package (FMi)
\col@sep=\dimen141
\extrarowheight=\dimen142
\NC@list=\toks27
\extratabsurround=\skip61
\backup@length=\skip62
)
\everycr=\toks28
\minrowclearance=\skip63
)
\rownum=\count117
Package xcolor Info: Model `cmy' substituted by `cmy0' on input line 1348.
Package xcolor Info: Model `hsb' substituted by `rgb' on input line 1352.
Package xcolor Info: Model `RGB' extended on input line 1364.
Package xcolor Info: Model `HTML' substituted by `rgb' on input line 1366.
Package xcolor Info: Model `Hsb' substituted by `hsb' on input line 1367.
Package xcolor Info: Model `tHsb' substituted by `hsb' on input line 1368.
Package xcolor Info: Model `HSB' substituted by `hsb' on input line 1369.
Package xcolor Info: Model `Gray' substituted by `gray' on input line 1370.
Package xcolor Info: Model `wave' substituted by `hsb' on input line 1371.
)
(c:/texlive/2017/texmf-dist/tex/latex/soul/soul.sty
Package: soul 2003/11/17 v2.4 letterspacing/underlining (mf)
\SOUL@word=\toks29
\SOUL@lasttoken=\toks30
\SOUL@cmds=\toks31
\SOUL@buffer=\toks32
\SOUL@token=\toks33
\SOUL@spaceskip=\skip64
\SOUL@ttwidth=\dimen143
\SOUL@uldp=\dimen144
\SOUL@ulht=\dimen145
)
(c:/texlive/2017/texmf-dist/tex/latex/multirow/multirow.sty
Package: multirow 2016/11/25 v2.2 Span multiple rows of a table
\multirow@colwidth=\skip65
\multirow@cntb=\count118
\multirow@dima=\skip66
\bigstrutjot=\dimen146
)
(c:/texlive/2017/texmf-dist/tex/latex/microtype/microtype.sty
Package: microtype 2016/05/14 v2.6a Micro-typographical refinements (RS)
\MT@toks=\toks34
\MT@count=\count119
LaTeX Info: Redefining \textls on input line 774.
\MT@outer@kern=\dimen147
LaTeX Info: Redefining \textmicrotypecontext on input line 1310.
\MT@listname@count=\count120

(c:/texlive/2017/texmf-dist/tex/latex/microtype/microtype-pdftex.def
File: microtype-pdftex.def 2016/05/14 v2.6a Definitions specific to pdftex (RS)

LaTeX Info: Redefining \lsstyle on input line 916.
LaTeX Info: Redefining \lslig on input line 916.
\MT@outer@space=\skip67
)
Package microtype Info: Loading configuration file microtype.cfg.

(c:/texlive/2017/texmf-dist/tex/latex/microtype/microtype.cfg
File: microtype.cfg 2016/05/14 v2.6a microtype main configuration file (RS)
))
(c:/texlive/2017/texmf-dist/tex/latex/pgf/frontendlayer/tikz.sty
(c:/texlive/2017/texmf-dist/tex/latex/pgf/basiclayer/pgf.sty
(c:/texlive/2017/texmf-dist/tex/latex/pgf/utilities/pgfrcs.sty
(c:/texlive/2017/texmf-dist/tex/generic/pgf/utilities/pgfutil-common.tex
\pgfutil@everybye=\toks35
\pgfutil@tempdima=\dimen148
\pgfutil@tempdimb=\dimen149

(c:/texlive/2017/texmf-dist/tex/generic/pgf/utilities/pgfutil-common-lists.tex)
) (c:/texlive/2017/texmf-dist/tex/generic/pgf/utilities/pgfutil-latex.def
\pgfutil@abb=\box33

(c:/texlive/2017/texmf-dist/tex/latex/ms/everyshi.sty
Package: everyshi 2001/05/15 v3.00 EveryShipout Package (MS)
))
(c:/texlive/2017/texmf-dist/tex/generic/pgf/utilities/pgfrcs.code.tex
Package: pgfrcs 2015/08/07 v3.0.1a (rcs-revision 1.31)
))
Package: pgf 2015/08/07 v3.0.1a (rcs-revision 1.15)

(c:/texlive/2017/texmf-dist/tex/latex/pgf/basiclayer/pgfcore.sty
(c:/texlive/2017/texmf-dist/tex/latex/pgf/systemlayer/pgfsys.sty
(c:/texlive/2017/texmf-dist/tex/generic/pgf/systemlayer/pgfsys.code.tex
Package: pgfsys 2014/07/09 v3.0.1a (rcs-revision 1.48)

(c:/texlive/2017/texmf-dist/tex/generic/pgf/utilities/pgfkeys.code.tex
\pgfkeys@pathtoks=\toks36
\pgfkeys@temptoks=\toks37

(c:/texlive/2017/texmf-dist/tex/generic/pgf/utilities/pgfkeysfiltered.code.tex
\pgfkeys@tmptoks=\toks38
))
\pgf@x=\dimen150
\pgf@y=\dimen151
\pgf@xa=\dimen152
\pgf@ya=\dimen153
\pgf@xb=\dimen154
\pgf@yb=\dimen155
\pgf@xc=\dimen156
\pgf@yc=\dimen157
\w@pgf@writea=\write3
\r@pgf@reada=\read1
\c@pgf@counta=\count121
\c@pgf@countb=\count122
\c@pgf@countc=\count123
\c@pgf@countd=\count124
\t@pgf@toka=\toks39
\t@pgf@tokb=\toks40
\t@pgf@tokc=\toks41
 (c:/texlive/2017/texmf-dist/tex/generic/pgf/systemlayer/pgf.cfg
File: pgf.cfg 2008/05/14  (rcs-revision 1.7)
)
Driver file for pgf: pgfsys-pdftex.def

(c:/texlive/2017/texmf-dist/tex/generic/pgf/systemlayer/pgfsys-pdftex.def
File: pgfsys-pdftex.def 2014/10/11  (rcs-revision 1.35)

(c:/texlive/2017/texmf-dist/tex/generic/pgf/systemlayer/pgfsys-common-pdf.def
File: pgfsys-common-pdf.def 2013/10/10  (rcs-revision 1.13)
)))
(c:/texlive/2017/texmf-dist/tex/generic/pgf/systemlayer/pgfsyssoftpath.code.tex
File: pgfsyssoftpath.code.tex 2013/09/09  (rcs-revision 1.9)
\pgfsyssoftpath@smallbuffer@items=\count125
\pgfsyssoftpath@bigbuffer@items=\count126
)
(c:/texlive/2017/texmf-dist/tex/generic/pgf/systemlayer/pgfsysprotocol.code.tex
File: pgfsysprotocol.code.tex 2006/10/16  (rcs-revision 1.4)
)) (c:/texlive/2017/texmf-dist/tex/generic/pgf/basiclayer/pgfcore.code.tex
Package: pgfcore 2010/04/11 v3.0.1a (rcs-revision 1.7)

(c:/texlive/2017/texmf-dist/tex/generic/pgf/math/pgfmath.code.tex
(c:/texlive/2017/texmf-dist/tex/generic/pgf/math/pgfmathcalc.code.tex
(c:/texlive/2017/texmf-dist/tex/generic/pgf/math/pgfmathutil.code.tex)
(c:/texlive/2017/texmf-dist/tex/generic/pgf/math/pgfmathparser.code.tex
\pgfmath@dimen=\dimen158
\pgfmath@count=\count127
\pgfmath@box=\box34
\pgfmath@toks=\toks42
\pgfmath@stack@operand=\toks43
\pgfmath@stack@operation=\toks44
)
(c:/texlive/2017/texmf-dist/tex/generic/pgf/math/pgfmathfunctions.code.tex
(c:/texlive/2017/texmf-dist/tex/generic/pgf/math/pgfmathfunctions.basic.code.te
x)
(c:/texlive/2017/texmf-dist/tex/generic/pgf/math/pgfmathfunctions.trigonometric
.code.tex)
(c:/texlive/2017/texmf-dist/tex/generic/pgf/math/pgfmathfunctions.random.code.t
ex)
(c:/texlive/2017/texmf-dist/tex/generic/pgf/math/pgfmathfunctions.comparison.co
de.tex)
(c:/texlive/2017/texmf-dist/tex/generic/pgf/math/pgfmathfunctions.base.code.tex
)
(c:/texlive/2017/texmf-dist/tex/generic/pgf/math/pgfmathfunctions.round.code.te
x)
(c:/texlive/2017/texmf-dist/tex/generic/pgf/math/pgfmathfunctions.misc.code.tex
)
(c:/texlive/2017/texmf-dist/tex/generic/pgf/math/pgfmathfunctions.integerarithm
etics.code.tex)))
(c:/texlive/2017/texmf-dist/tex/generic/pgf/math/pgfmathfloat.code.tex
\c@pgfmathroundto@lastzeros=\count128
))
(c:/texlive/2017/texmf-dist/tex/generic/pgf/basiclayer/pgfcorepoints.code.tex
File: pgfcorepoints.code.tex 2013/10/07  (rcs-revision 1.27)
\pgf@picminx=\dimen159
\pgf@picmaxx=\dimen160
\pgf@picminy=\dimen161
\pgf@picmaxy=\dimen162
\pgf@pathminx=\dimen163
\pgf@pathmaxx=\dimen164
\pgf@pathminy=\dimen165
\pgf@pathmaxy=\dimen166
\pgf@xx=\dimen167
\pgf@xy=\dimen168
\pgf@yx=\dimen169
\pgf@yy=\dimen170
\pgf@zx=\dimen171
\pgf@zy=\dimen172
)
(c:/texlive/2017/texmf-dist/tex/generic/pgf/basiclayer/pgfcorepathconstruct.cod
e.tex
File: pgfcorepathconstruct.code.tex 2013/10/07  (rcs-revision 1.29)
\pgf@path@lastx=\dimen173
\pgf@path@lasty=\dimen174
)
(c:/texlive/2017/texmf-dist/tex/generic/pgf/basiclayer/pgfcorepathusage.code.te
x
File: pgfcorepathusage.code.tex 2014/11/02  (rcs-revision 1.24)
\pgf@shorten@end@additional=\dimen175
\pgf@shorten@start@additional=\dimen176
)
(c:/texlive/2017/texmf-dist/tex/generic/pgf/basiclayer/pgfcorescopes.code.tex
File: pgfcorescopes.code.tex 2015/05/08  (rcs-revision 1.46)
\pgfpic=\box35
\pgf@hbox=\box36
\pgf@layerbox@main=\box37
\pgf@picture@serial@count=\count129
)
(c:/texlive/2017/texmf-dist/tex/generic/pgf/basiclayer/pgfcoregraphicstate.code
.tex
File: pgfcoregraphicstate.code.tex 2014/11/02  (rcs-revision 1.12)
\pgflinewidth=\dimen177
)
(c:/texlive/2017/texmf-dist/tex/generic/pgf/basiclayer/pgfcoretransformations.c
ode.tex
File: pgfcoretransformations.code.tex 2015/08/07  (rcs-revision 1.20)
\pgf@pt@x=\dimen178
\pgf@pt@y=\dimen179
\pgf@pt@temp=\dimen180
)
(c:/texlive/2017/texmf-dist/tex/generic/pgf/basiclayer/pgfcorequick.code.tex
File: pgfcorequick.code.tex 2008/10/09  (rcs-revision 1.3)
)
(c:/texlive/2017/texmf-dist/tex/generic/pgf/basiclayer/pgfcoreobjects.code.tex
File: pgfcoreobjects.code.tex 2006/10/11  (rcs-revision 1.2)
)
(c:/texlive/2017/texmf-dist/tex/generic/pgf/basiclayer/pgfcorepathprocessing.co
de.tex
File: pgfcorepathprocessing.code.tex 2013/09/09  (rcs-revision 1.9)
)
(c:/texlive/2017/texmf-dist/tex/generic/pgf/basiclayer/pgfcorearrows.code.tex
File: pgfcorearrows.code.tex 2015/05/14  (rcs-revision 1.43)
\pgfarrowsep=\dimen181
)
(c:/texlive/2017/texmf-dist/tex/generic/pgf/basiclayer/pgfcoreshade.code.tex
File: pgfcoreshade.code.tex 2013/07/15  (rcs-revision 1.15)
\pgf@max=\dimen182
\pgf@sys@shading@range@num=\count130
)
(c:/texlive/2017/texmf-dist/tex/generic/pgf/basiclayer/pgfcoreimage.code.tex
File: pgfcoreimage.code.tex 2013/07/15  (rcs-revision 1.18)

(c:/texlive/2017/texmf-dist/tex/generic/pgf/basiclayer/pgfcoreexternal.code.tex
File: pgfcoreexternal.code.tex 2014/07/09  (rcs-revision 1.21)
\pgfexternal@startupbox=\box38
))
(c:/texlive/2017/texmf-dist/tex/generic/pgf/basiclayer/pgfcorelayers.code.tex
File: pgfcorelayers.code.tex 2013/07/18  (rcs-revision 1.7)
)
(c:/texlive/2017/texmf-dist/tex/generic/pgf/basiclayer/pgfcoretransparency.code
.tex
File: pgfcoretransparency.code.tex 2013/09/30  (rcs-revision 1.5)
)
(c:/texlive/2017/texmf-dist/tex/generic/pgf/basiclayer/pgfcorepatterns.code.tex
File: pgfcorepatterns.code.tex 2013/11/07  (rcs-revision 1.5)
)))
(c:/texlive/2017/texmf-dist/tex/generic/pgf/modules/pgfmoduleshapes.code.tex
File: pgfmoduleshapes.code.tex 2014/03/21  (rcs-revision 1.35)
\pgfnodeparttextbox=\box39
)
(c:/texlive/2017/texmf-dist/tex/generic/pgf/modules/pgfmoduleplot.code.tex
File: pgfmoduleplot.code.tex 2015/08/03  (rcs-revision 1.13)
)
(c:/texlive/2017/texmf-dist/tex/latex/pgf/compatibility/pgfcomp-version-0-65.st
y
Package: pgfcomp-version-0-65 2007/07/03 v3.0.1a (rcs-revision 1.7)
\pgf@nodesepstart=\dimen183
\pgf@nodesepend=\dimen184
)
(c:/texlive/2017/texmf-dist/tex/latex/pgf/compatibility/pgfcomp-version-1-18.st
y
Package: pgfcomp-version-1-18 2007/07/23 v3.0.1a (rcs-revision 1.1)
)) (c:/texlive/2017/texmf-dist/tex/latex/pgf/utilities/pgffor.sty
(c:/texlive/2017/texmf-dist/tex/latex/pgf/utilities/pgfkeys.sty
(c:/texlive/2017/texmf-dist/tex/generic/pgf/utilities/pgfkeys.code.tex))
(c:/texlive/2017/texmf-dist/tex/latex/pgf/math/pgfmath.sty
(c:/texlive/2017/texmf-dist/tex/generic/pgf/math/pgfmath.code.tex))
(c:/texlive/2017/texmf-dist/tex/generic/pgf/utilities/pgffor.code.tex
Package: pgffor 2013/12/13 v3.0.1a (rcs-revision 1.25)

(c:/texlive/2017/texmf-dist/tex/generic/pgf/math/pgfmath.code.tex)
\pgffor@iter=\dimen185
\pgffor@skip=\dimen186
\pgffor@stack=\toks45
\pgffor@toks=\toks46
))
(c:/texlive/2017/texmf-dist/tex/generic/pgf/frontendlayer/tikz/tikz.code.tex
Package: tikz 2015/08/07 v3.0.1a (rcs-revision 1.151)

(c:/texlive/2017/texmf-dist/tex/generic/pgf/libraries/pgflibraryplothandlers.co
de.tex
File: pgflibraryplothandlers.code.tex 2013/08/31 v3.0.1a (rcs-revision 1.20)
\pgf@plot@mark@count=\count131
\pgfplotmarksize=\dimen187
)
\tikz@lastx=\dimen188
\tikz@lasty=\dimen189
\tikz@lastxsaved=\dimen190
\tikz@lastysaved=\dimen191
\tikzleveldistance=\dimen192
\tikzsiblingdistance=\dimen193
\tikz@figbox=\box40
\tikz@figbox@bg=\box41
\tikz@tempbox=\box42
\tikz@tempbox@bg=\box43
\tikztreelevel=\count132
\tikznumberofchildren=\count133
\tikznumberofcurrentchild=\count134
\tikz@fig@count=\count135

(c:/texlive/2017/texmf-dist/tex/generic/pgf/modules/pgfmodulematrix.code.tex
File: pgfmodulematrix.code.tex 2013/09/17  (rcs-revision 1.8)
\pgfmatrixcurrentrow=\count136
\pgfmatrixcurrentcolumn=\count137
\pgf@matrix@numberofcolumns=\count138
)
\tikz@expandcount=\count139

(c:/texlive/2017/texmf-dist/tex/generic/pgf/frontendlayer/tikz/libraries/tikzli
brarytopaths.code.tex
File: tikzlibrarytopaths.code.tex 2008/06/17 v3.0.1a (rcs-revision 1.2)
)))
(c:/texlive/2017/texmf-dist/tex/latex/totcount/totcount.sty
Package: totcount 2011/01/25 v1.2 package for gettingthe total value of LaTeX c
ounters
)
(./Definitions/journalnames.tex)
(c:/texlive/2017/texmf-dist/tex/latex/amscls/amsthm.sty
Package: amsthm 2015/03/04 v2.20.2
\thm@style=\toks47
\thm@bodyfont=\toks48
\thm@headfont=\toks49
\thm@notefont=\toks50
\thm@headpunct=\toks51
\thm@preskip=\skip68
\thm@postskip=\skip69
\thm@headsep=\skip70
\dth@everypar=\toks52
)
\c@theorem=\count140
\c@lemma=\count141
\c@corollary=\count142
\c@proposition=\count143
\c@characterization=\count144
\c@property=\count145
\c@problem=\count146
\c@example=\count147
\c@examplesanddefinitions=\count148
\c@remark=\count149
\c@definition=\count150
\c@hypothesis=\count151
\c@notation=\count152
\c@assumption=\count153

(c:/texlive/2017/texmf-dist/tex/latex/hyphenat/hyphenat.sty
Package: hyphenat 2009/09/02 v2.3c hyphenation utilities
\langwohyphens=\language84
LaTeX Info: Redefining \_ on input line 43.
)
(c:/texlive/2017/texmf-dist/tex/latex/natbib/natbib.sty
Package: natbib 2010/09/13 8.31b (PWD, AO)
\bibhang=\skip71
\bibsep=\skip72
LaTeX Info: Redefining \cite on input line 694.
\c@NAT@ctr=\count154
)
(c:/texlive/2017/texmf-dist/tex/latex/hyperref/hyperref.sty
Package: hyperref 2017/03/14 v6.85a Hypertext links for LaTeX

(c:/texlive/2017/texmf-dist/tex/generic/oberdiek/hobsub-hyperref.sty
Package: hobsub-hyperref 2016/05/16 v1.14 Bundle oberdiek, subset hyperref (HO)


(c:/texlive/2017/texmf-dist/tex/generic/oberdiek/hobsub-generic.sty
Package: hobsub-generic 2016/05/16 v1.14 Bundle oberdiek, subset generic (HO)
Package: hobsub 2016/05/16 v1.14 Construct package bundles (HO)
Package hobsub Info: Skipping package `infwarerr' (already loaded).
Package hobsub Info: Skipping package `ltxcmds' (already loaded).
Package hobsub Info: Skipping package `ifluatex' (already loaded).
Package: ifvtex 2016/05/16 v1.6 Detect VTeX and its facilities (HO)
Package ifvtex Info: VTeX not detected.
Package: intcalc 2016/05/16 v1.2 Expandable calculations with integers (HO)
Package hobsub Info: Skipping package `ifpdf' (already loaded).
Package hobsub Info: Skipping package `etexcmds' (already loaded).
Package hobsub Info: Skipping package `kvsetkeys' (already loaded).
Package hobsub Info: Skipping package `kvdefinekeys' (already loaded).
Package hobsub Info: Skipping package `pdftexcmds' (already loaded).
Package: pdfescape 2016/05/16 v1.14 Implements pdfTeX's escape features (HO)
Package: bigintcalc 2016/05/16 v1.4 Expandable calculations on big integers (HO
)
Package: bitset 2016/05/16 v1.2 Handle bit-vector datatype (HO)
Package: uniquecounter 2016/05/16 v1.3 Provide unlimited unique counter (HO)
)
Package hobsub Info: Skipping package `hobsub' (already loaded).
Package: letltxmacro 2016/05/16 v1.5 Let assignment for LaTeX macros (HO)
Package: hopatch 2016/05/16 v1.3 Wrapper for package hooks (HO)
Package: xcolor-patch 2016/05/16 xcolor patch
Package: atveryend 2016/05/16 v1.9 Hooks at the very end of document (HO)
Package: atbegshi 2016/06/09 v1.18 At begin shipout hook (HO)
Package: refcount 2016/05/16 v3.5 Data extraction from label references (HO)
Package: hycolor 2016/05/16 v1.8 Color options for hyperref/bookmark (HO)
)
(c:/texlive/2017/texmf-dist/tex/generic/ifxetex/ifxetex.sty
Package: ifxetex 2010/09/12 v0.6 Provides ifxetex conditional
)
(c:/texlive/2017/texmf-dist/tex/latex/oberdiek/auxhook.sty
Package: auxhook 2016/05/16 v1.4 Hooks for auxiliary files (HO)
)
\@linkdim=\dimen194
\Hy@linkcounter=\count155
\Hy@pagecounter=\count156

(c:/texlive/2017/texmf-dist/tex/latex/hyperref/pd1enc.def
File: pd1enc.def 2017/03/14 v6.85a Hyperref: PDFDocEncoding definition (HO)
Now handling font encoding PD1 ...
... no UTF-8 mapping file for font encoding PD1
)
\Hy@SavedSpaceFactor=\count157

(c:/texlive/2017/texmf-dist/tex/latex/latexconfig/hyperref.cfg
File: hyperref.cfg 2002/06/06 v1.2 hyperref configuration of TeXLive
)
Package hyperref Info: Option `unicode' set `true' on input line 4374.

(c:/texlive/2017/texmf-dist/tex/latex/hyperref/puenc.def
File: puenc.def 2017/03/14 v6.85a Hyperref: PDF Unicode definition (HO)
Now handling font encoding PU ...
... no UTF-8 mapping file for font encoding PU
)
Package hyperref Info: Option `bookmarksopen' set `true' on input line 4374.
Package hyperref Info: Option `pdffitwindow' set `true' on input line 4374.
Package hyperref Info: Option `colorlinks' set `true' on input line 4374.
Package hyperref Info: Option `hyperfootnotes' set `false' on input line 4374.
Package hyperref Info: Hyper figures OFF on input line 4498.
Package hyperref Info: Link nesting OFF on input line 4503.
Package hyperref Info: Hyper index ON on input line 4506.
Package hyperref Info: Plain pages OFF on input line 4513.
Package hyperref Info: Backreferencing OFF on input line 4518.
Package hyperref Info: Implicit mode ON; LaTeX internals redefined.
Package hyperref Info: Bookmarks ON on input line 4751.
\c@Hy@tempcnt=\count158

(c:/texlive/2017/texmf-dist/tex/latex/url/url.sty
\Urlmuskip=\muskip11
Package: url 2013/09/16  ver 3.4  Verb mode for urls, etc.
)
LaTeX Info: Redefining \url on input line 5104.
\XeTeXLinkMargin=\dimen195
\Fld@menulength=\count159
\Field@Width=\dimen196
\Fld@charsize=\dimen197
Package hyperref Info: Hyper figures OFF on input line 6358.
Package hyperref Info: Link nesting OFF on input line 6363.
Package hyperref Info: Hyper index ON on input line 6366.
Package hyperref Info: backreferencing OFF on input line 6373.
Package hyperref Info: Link coloring ON on input line 6376.
Package hyperref Info: Link coloring with OCG OFF on input line 6383.
Package hyperref Info: PDF/A mode OFF on input line 6388.
LaTeX Info: Redefining \ref on input line 6428.
LaTeX Info: Redefining \pageref on input line 6432.
\Hy@abspage=\count160
\c@Item=\count161
)

Package hyperref Message: Driver: hpdftex.

(c:/texlive/2017/texmf-dist/tex/latex/hyperref/hpdftex.def
File: hpdftex.def 2017/03/14 v6.85a Hyperref driver for pdfTeX
\Fld@listcount=\count162
\c@bookmark@seq@number=\count163

(c:/texlive/2017/texmf-dist/tex/latex/oberdiek/rerunfilecheck.sty
Package: rerunfilecheck 2016/05/16 v1.8 Rerun checks for auxiliary files (HO)
Package uniquecounter Info: New unique counter `rerunfilecheck' on input line 2
82.
)
\Hy@SectionHShift=\skip73
)
(c:/texlive/2017/texmf-dist/tex/latex/footmisc/footmisc.sty
Package: footmisc 2011/06/06 v5.5b a miscellany of footnote facilities
\FN@temptoken=\toks53
\footnotemargin=\dimen198
\c@pp@next@reset=\count164
Package footmisc Info: Declaring symbol style bringhurst on input line 855.
Package footmisc Info: Declaring symbol style chicago on input line 863.
Package footmisc Info: Declaring symbol style wiley on input line 872.
Package footmisc Info: Declaring symbol style lamport-robust on input line 883.

Package footmisc Info: Declaring symbol style lamport* on input line 903.
Package footmisc Info: Declaring symbol style lamport*-robust on input line 924
.
)
\c@page@totc=\count165

(c:/texlive/2017/texmf-dist/tex/latex/titlesec/block.tss
File: block.tss 2016/03/15
)
(c:/texlive/2017/texmf-dist/tex/latex/geometry/geometry.sty
Package: geometry 2010/09/12 v5.6 Page Geometry
\Gm@cnth=\count166
\Gm@cntv=\count167
\c@Gm@tempcnt=\count168
\Gm@bindingoffset=\dimen199
\Gm@wd@mp=\dimen256
\Gm@odd@mp=\dimen257
\Gm@even@mp=\dimen258
\Gm@layoutwidth=\dimen259
\Gm@layoutheight=\dimen260
\Gm@layouthoffset=\dimen261
\Gm@layoutvoffset=\dimen262
\Gm@dimlist=\toks54
)
(c:/texlive/2017/texmf-dist/tex/latex/caption/newfloat.sty
Package: newfloat 2015/09/17 v1.1-109 Defining new floating environments (AR)
)
Package newfloat Info: New float `listing' with options `' on input line 988.
\c@listing=\count169
Package newfloat Info: float type `listing'=4 on input line 988.
Package newfloat Info: New float `boxenv' with options `name=Box' on input line
 989.
\c@boxenv=\count170
Package newfloat Info: float type `boxenv'=8 on input line 989.
Package newfloat Info: New float `chart' with options `' on input line 990.
\c@chart=\count171
Package newfloat Info: float type `chart'=16 on input line 990.
Package newfloat Info: New float `scheme' with options `' on input line 991.
\c@scheme=\count172
Package newfloat Info: float type `scheme'=32 on input line 991.

(c:/texlive/2017/texmf-dist/tex/latex/caption/caption.sty
Package: caption 2016/02/21 v3.3-144 Customizing captions (AR)

(c:/texlive/2017/texmf-dist/tex/latex/caption/caption3.sty
Package: caption3 2016/05/22 v1.7-166 caption3 kernel (AR)
Package caption3 Info: TeX engine: e-TeX on input line 67.
\captionmargin=\dimen263
\captionmargin@=\dimen264
\captionwidth=\dimen265
\caption@tempdima=\dimen266
\caption@indent=\dimen267
\caption@parindent=\dimen268
\caption@hangindent=\dimen269
)
\c@ContinuedFloat=\count173
Package caption Info: float package is loaded.
Package caption Info: hyperref package is loaded.
)
\@justcentbox=\box44
\wideitemsep=\skip74
)
(c:/texlive/2017/texmf-dist/tex/latex/wrapfig/wrapfig.sty
\wrapoverhang=\dimen270
\WF@size=\dimen271
\c@WF@wrappedlines=\count174
\WF@box=\box45
\WF@everypar=\toks55
Package: wrapfig 2003/01/31  v 3.6
)
(c:/texlive/2017/texmf-dist/tex/latex/subfigure/subfigure.sty
Package: subfigure 2002/03/15 v2.1.5 subfigure package
\subfigtopskip=\skip75
\subfigcapskip=\skip76
\subfigcaptopadj=\dimen272
\subfigbottomskip=\skip77
\subfigcapmargin=\dimen273
\subfiglabelskip=\skip78
\c@subfigure=\count175
\c@lofdepth=\count176
\c@subtable=\count177
\c@lotdepth=\count178

****************************************
* Local config file subfigure.cfg used *
****************************************
(c:/texlive/2017/texmf-dist/tex/latex/subfigure/subfigure.cfg)
\subfig@top=\skip79
\subfig@bottom=\skip80
)
(c:/texlive/2017/texmf-dist/tex/latex/siunitx/siunitx.sty
(c:/texlive/2017/texmf-dist/tex/latex/l3kernel/expl3.sty
Package: expl3 2017/05/13 L3 programming layer (loader) 

(c:/texlive/2017/texmf-dist/tex/latex/l3kernel/expl3-code.tex
Package: expl3 2017/05/13 L3 programming layer (code)
\c_max_int=\count179
\l_tmpa_int=\count180
\l_tmpb_int=\count181
\g_tmpa_int=\count182
\g_tmpb_int=\count183
\g__prg_map_int=\count184
\c_log_iow=\count185
\l_iow_line_count_int=\count186
\l__iow_line_target_int=\count187
\l__iow_one_indent_int=\count188
\l__iow_indent_int=\count189
\c_zero_dim=\dimen274
\c_max_dim=\dimen275
\l_tmpa_dim=\dimen276
\l_tmpb_dim=\dimen277
\g_tmpa_dim=\dimen278
\g_tmpb_dim=\dimen279
\c_zero_skip=\skip81
\c_max_skip=\skip82
\l_tmpa_skip=\skip83
\l_tmpb_skip=\skip84
\g_tmpa_skip=\skip85
\g_tmpb_skip=\skip86
\c_zero_muskip=\muskip12
\c_max_muskip=\muskip13
\l_tmpa_muskip=\muskip14
\l_tmpb_muskip=\muskip15
\g_tmpa_muskip=\muskip16
\g_tmpb_muskip=\muskip17
\l_keys_choice_int=\count190
\c__fp_leading_shift_int=\count191
\c__fp_middle_shift_int=\count192
\c__fp_trailing_shift_int=\count193
\c__fp_big_leading_shift_int=\count194
\c__fp_big_middle_shift_int=\count195
\c__fp_big_trailing_shift_int=\count196
\c__fp_Bigg_leading_shift_int=\count197
\c__fp_Bigg_middle_shift_int=\count198
\c__fp_Bigg_trailing_shift_int=\count199
\c__fp_rand_size_int=\count266
\c__fp_rand_four_int=\count267
\c__fp_rand_eight_int=\count268
\l__sort_length_int=\count269
\l__sort_min_int=\count270
\l__sort_top_int=\count271
\l__sort_max_int=\count272
\l__sort_true_max_int=\count273
\l__sort_block_int=\count274
\l__sort_begin_int=\count275
\l__sort_end_int=\count276
\l__sort_A_int=\count277
\l__sort_B_int=\count278
\l__sort_C_int=\count279
\c_empty_box=\box46
\l_tmpa_box=\box47
\l_tmpb_box=\box48
\g_tmpa_box=\box49
\g_tmpb_box=\box50
\l__box_top_dim=\dimen280
\l__box_bottom_dim=\dimen281
\l__box_left_dim=\dimen282
\l__box_right_dim=\dimen283
\l__box_top_new_dim=\dimen284
\l__box_bottom_new_dim=\dimen285
\l__box_left_new_dim=\dimen286
\l__box_right_new_dim=\dimen287
\l__box_internal_box=\box51
\l__coffin_internal_box=\box52
\l__coffin_internal_dim=\dimen288
\l__coffin_offset_x_dim=\dimen289
\l__coffin_offset_y_dim=\dimen290
\l__coffin_x_dim=\dimen291
\l__coffin_y_dim=\dimen292
\l__coffin_x_prime_dim=\dimen293
\l__coffin_y_prime_dim=\dimen294
\c_empty_coffin=\box53
\l__coffin_aligned_coffin=\box54
\l__coffin_aligned_internal_coffin=\box55
\l_tmpa_coffin=\box56
\l_tmpb_coffin=\box57
\l__coffin_display_coffin=\box58
\l__coffin_display_coord_coffin=\box59
\l__coffin_display_pole_coffin=\box60
\l__coffin_display_offset_dim=\dimen295
\l__coffin_display_x_dim=\dimen296
\l__coffin_display_y_dim=\dimen297
\l__coffin_bounding_shift_dim=\dimen298
\l__coffin_left_corner_dim=\dimen299
\l__coffin_right_corner_dim=\dimen300
\l__coffin_bottom_corner_dim=\dimen301
\l__coffin_top_corner_dim=\dimen302
\l__coffin_scaled_total_height_dim=\dimen303
\l__coffin_scaled_width_dim=\dimen304
)
(c:/texlive/2017/texmf-dist/tex/latex/l3kernel/l3pdfmode.def
File: l3pdfmode.def 2017/03/18 v L3 Experimental driver: PDF mode
\l__driver_color_stack_int=\count280
\l__driver_tmp_box=\box61
))
(c:/texlive/2017/texmf-dist/tex/latex/l3packages/xparse/xparse.sty
Package: xparse 2017/05/13 L3 Experimental document command parser
\l__xparse_current_arg_int=\count281
\g__xparse_grabber_int=\count282
\l__xparse_m_args_int=\count283
\l__xparse_mandatory_args_int=\count284
\l__xparse_v_nesting_int=\count285
)
Package: siunitx 2017/05/19 v2.7g A comprehensive (SI) units package

(c:/texlive/2017/texmf-dist/tex/latex/l3packages/l3keys2e/l3keys2e.sty
Package: l3keys2e 2017/05/13 LaTeX2e option processing using LaTeX3 keys
)
\l__siunitx_tmp_box=\box62
\l__siunitx_tmp_dim=\dimen305
\l__siunitx_tmp_int=\count286
\l__siunitx_number_mantissa_length_int=\count287
\l__siunitx_number_uncert_length_int=\count288
\l__siunitx_round_int=\count289
\l__siunitx_process_decimal_int=\count290
\l__siunitx_process_uncertainty_int=\count291
\l__siunitx_process_fixed_int=\count292
\l__siunitx_process_integer_min_int=\count293
\l__siunitx_process_precision_int=\count294
\l__siunitx_group_min_int=\count295
\l__siunitx_angle_marker_box=\box63
\l__siunitx_angle_unit_box=\box64
\l__siunitx_angle_marker_dim=\dimen306
\l__siunitx_angle_unit_dim=\dimen307
\l__siunitx_unit_int=\count296
\l__siunitx_unit_denominator_int=\count297
\l__siunitx_unit_numerator_int=\count298
\l__siunitx_unit_prefix_int=\count299
\l__siunitx_unit_prefix_base_int=\count300
\l__siunitx_unit_prefix_gram_int=\count301
\l__siunitx_number_product_int=\count302
\c__siunitx_one_fill_skip=\skip87
\l__siunitx_table_unit_align_skip=\skip88
\l__siunitx_table_exponent_dim=\dimen308
\l__siunitx_table_integer_dim=\dimen309
\l__siunitx_table_mantissa_dim=\dimen310
\l__siunitx_table_marker_dim=\dimen311
\l__siunitx_table_result_dim=\dimen312
\l__siunitx_table_uncert_dim=\dimen313
\l__siunitx_table_fill_pre_dim=\dimen314
\l__siunitx_table_fill_post_dim=\dimen315
\l__siunitx_table_fill_mid_dim=\dimen316
\l__siunitx_table_pre_box=\box65
\l__siunitx_table_post_box=\box66
\l__siunitx_table_mantissa_box=\box67
\l__siunitx_table_result_box=\box68
\l__siunitx_table_number_align_skip=\skip89
\l__siunitx_table_text_align_skip=\skip90
.................................................
. LaTeX info: "xparse/define-command"
. 
. Defining command \DeclareBinaryPrefix with sig. 'mmm' on line 7251.
.................................................
.................................................
. LaTeX info: "xparse/define-command"
. 
. Defining command \DeclareSIPostPower with sig. 'mm' on line 7254.
.................................................
.................................................
. LaTeX info: "xparse/define-command"
. 
. Defining command \DeclareSIPrefix with sig. 'mmm' on line 7257.
.................................................
.................................................
. LaTeX info: "xparse/define-command"
. 
. Defining command \DeclareSIPrePower with sig. 'mm' on line 7260.
.................................................
.................................................
. LaTeX info: "xparse/define-command"
. 
. Defining command \DeclareSIQualifier with sig. 'mm' on line 7263.
.................................................
.................................................
. LaTeX info: "xparse/define-command"
. 
. Defining command \DeclareSIUnit with sig. 'O{}mm' on line 7266.
.................................................
.................................................
. LaTeX info: "xparse/define-command"
. 
. Defining command \DeclareSIUnitWithOptions with sig. 'mmm' on line 7269.
.................................................
.................................................
. LaTeX info: "xparse/define-command"
. 
. Defining command \ang with sig. 'o>{\SplitArgument {2}{;}}m' on line 7284.
.................................................
.................................................
. LaTeX info: "xparse/define-command"
. 
. Defining command \num with sig. 'om' on line 7293.
.................................................
.................................................
. LaTeX info: "xparse/define-command"
. 
. Defining command \numlist with sig. 'o>{\SplitList {;}}m' on line 7302.
.................................................
.................................................
. LaTeX info: "xparse/define-command"
. 
. Defining command \numrange with sig. 'omm' on line 7311.
.................................................
.................................................
. LaTeX info: "xparse/define-command"
. 
. Defining command \SIlist with sig. 'o>{\SplitList {;}}mm' on line 7323.
.................................................
.................................................
. LaTeX info: "xparse/define-command"
. 
. Defining command \SIrange with sig. 'ommm' on line 7335.
.................................................
.................................................
. LaTeX info: "xparse/define-command"
. 
. Defining command \SI with sig. 'omom' on line 7347.
.................................................
.................................................
. LaTeX info: "xparse/define-command"
. 
. Defining command \sisetup with sig. 'm' on line 7350.
.................................................
.................................................
. LaTeX info: "xparse/define-command"
. 
. Defining command \tablenum with sig. 'om' on line 7365.
.................................................
.................................................
. LaTeX info: "xparse/define-command"
. 
. Defining command \si with sig. 'om' on line 7377.
.................................................
.................................................
. LaTeX info: "xparse/define-command"
. 
. Defining command \numInBookmark with sig. 'om' on line 7424.
.................................................
.................................................
. LaTeX info: "xparse/define-command"
. 
. Defining command \numrangeInBookmark with sig. 'omm' on line 7426.
.................................................
.................................................
. LaTeX info: "xparse/define-command"
. 
. Defining command \SIInBookmark with sig. 'omom' on line 7428.
.................................................
.................................................
. LaTeX info: "xparse/define-command"
. 
. Defining command \SIlistInBookmark with sig. 'omm' on line 7430.
.................................................
.................................................
. LaTeX info: "xparse/define-command"
. 
. Defining command \SIrangeInBookmark with sig. 'ommm' on line 7432.
.................................................
.................................................
. LaTeX info: "xparse/define-command"
. 
. Defining command \siInBookmark with sig. 'om' on line 7433.
.................................................
\g__file_internal_ior=\read2

(c:/texlive/2017/texmf-dist/tex/latex/beamer/translator/translator.sty
Package: translator 2010/06/12 ver 1.10

(c:/texlive/2017/texmf-dist/tex/latex/beamer/translator/translator-language-map
pings.tex))) (c:/texlive/2017/texmf-dist/tex/latex/oberdiek/grffile.sty
Package: grffile 2016/05/16 v1.17 Extended file name support for graphics (HO)
Package grffile Info: Option `multidot' is set to `true'.
Package grffile Info: Option `extendedchars' is set to `false'.
Package grffile Info: Option `space' is set to `true'.
Package grffile Info: \Gin@ii of package `graphicx' fixed on input line 486.
)
(./supplementary-xml.aux)
\openout1 = `supplementary-xml.aux'.

LaTeX Font Info:    Checking defaults for OML/cmm/m/it on input line 146.
LaTeX Font Info:    ... okay on input line 146.
LaTeX Font Info:    Checking defaults for T1/cmr/m/n on input line 146.
LaTeX Font Info:    ... okay on input line 146.
LaTeX Font Info:    Checking defaults for OT1/cmr/m/n on input line 146.
LaTeX Font Info:    ... okay on input line 146.
LaTeX Font Info:    Checking defaults for OMS/cmsy/m/n on input line 146.
LaTeX Font Info:    ... okay on input line 146.
LaTeX Font Info:    Checking defaults for OMX/cmex/m/n on input line 146.
LaTeX Font Info:    ... okay on input line 146.
LaTeX Font Info:    Checking defaults for U/cmr/m/n on input line 146.
LaTeX Font Info:    ... okay on input line 146.
LaTeX Font Info:    Checking defaults for PD1/pdf/m/n on input line 146.
LaTeX Font Info:    ... okay on input line 146.
LaTeX Font Info:    Checking defaults for PU/pdf/m/n on input line 146.
LaTeX Font Info:    ... okay on input line 146.
LaTeX Font Info:    Try loading font information for T1+ppl on input line 146.
 (c:/texlive/2017/texmf-dist/tex/latex/psnfss/t1ppl.fd
File: t1ppl.fd 2001/06/04 font definitions for T1/ppl.
) (c:/texlive/2017/texmf-dist/tex/context/base/mkii/supp-pdf.mkii
[Loading MPS to PDF converter (version 2006.09.02).]
\scratchcounter=\count303
\scratchdimen=\dimen317
\scratchbox=\box69
\nofMPsegments=\count304
\nofMParguments=\count305
\everyMPshowfont=\toks56
\MPscratchCnt=\count306
\MPscratchDim=\dimen318
\MPnumerator=\count307
\makeMPintoPDFobject=\count308
\everyMPtoPDFconversion=\toks57
)
Package lastpage Info: Please have a look at the pageslts package at
(lastpage)             https://www.ctan.org/pkg/pageslts
(lastpage)             ! on input line 146.
LaTeX Info: Redefining \microtypecontext on input line 146.
Package microtype Info: Generating PDF output.
Package microtype Info: Character protrusion enabled (level 2).
Package microtype Info: Using default protrusion set `alltext'.
Package microtype Info: Automatic font expansion enabled (level 2),
(microtype)             stretch: 20, shrink: 20, step: 1, non-selected.
Package microtype Info: Using default expansion set `basictext'.
Package microtype Info: No adjustment of tracking.
Package microtype Info: No adjustment of interword spacing.
Package microtype Info: No adjustment of character kerning.
 (c:/texlive/2017/texmf-dist/tex/latex/microtype/mt-ppl.cfg
File: mt-ppl.cfg 2005/11/16 v1.6 microtype config. file: Palatino (RS)
)
ABD: EveryShipout initializing macros
\AtBeginShipoutBox=\box70
Package hyperref Info: Link coloring ON on input line 146.

(c:/texlive/2017/texmf-dist/tex/latex/hyperref/nameref.sty
Package: nameref 2016/05/21 v2.44 Cross-referencing by name of section

(c:/texlive/2017/texmf-dist/tex/generic/oberdiek/gettitlestring.sty
Package: gettitlestring 2016/05/16 v1.5 Cleanup title references (HO)
)
\c@section@level=\count309
)
LaTeX Info: Redefining \ref on input line 146.
LaTeX Info: Redefining \pageref on input line 146.
LaTeX Info: Redefining \nameref on input line 146.

(./supplementary-xml.out) (./supplementary-xml.out)
\@outlinefile=\write4
\openout4 = `supplementary-xml.out'.

\symAMSb=\mathgroup5

*geometry* detected driver: pdftex
*geometry* verbose mode - [ preamble ] result:
* driver: pdftex
* paper: <default>
* layout: <same size as paper>
* layoutoffset:(h,v)=(0.0pt,0.0pt)
* modes: includehead includefoot 
* h-part:(L,W,R)=(76.82234pt, 443.86319pt, 76.82234pt)
* v-part:(T,H,B)=(51.21504pt, 751.15268pt, 42.67912pt)
* \paperwidth=597.50787pt
* \paperheight=845.04684pt
* \textwidth=443.86319pt
* \textheight=684.15268pt
* \oddsidemargin=4.55235pt
* \evensidemargin=4.55235pt
* \topmargin=-21.05495pt
* \headheight=12.0pt
* \headsep=25.0pt
* \topskip=10.0pt
* \footskip=30.0pt
* \marginparwidth=57.0pt
* \marginparsep=11.0pt
* \columnsep=10.0pt
* \skip\footins=34.14322pt
* \hoffset=0.0pt
* \voffset=0.0pt
* \mag=1000
* \@twocolumnfalse
* \@twosidefalse
* \@mparswitchfalse
* \@reversemarginfalse
* (1in=72.27pt=25.4mm, 1cm=28.453pt)

Package caption Info: Begin \AtBeginDocument code.
Package caption Info: subfigure package is loaded.
Package caption Info: wrapfig package is loaded.
Package caption Info: End \AtBeginDocument code.
Now handling font encoding TS1 ...
... processing UTF-8 mapping file for font encoding TS1
(c:/texlive/2017/texmf-dist/tex/latex/base/ts1enc.dfu
File: ts1enc.dfu 2017/01/28 v1.1t UTF-8 support for inputenc
   defining Unicode char U+00A2 (decimal 162)
   defining Unicode char U+00A3 (decimal 163)
   defining Unicode char U+00A4 (decimal 164)
   defining Unicode char U+00A5 (decimal 165)
   defining Unicode char U+00A6 (decimal 166)
   defining Unicode char U+00A7 (decimal 167)
   defining Unicode char U+00A8 (decimal 168)
   defining Unicode char U+00A9 (decimal 169)
   defining Unicode char U+00AA (decimal 170)
   defining Unicode char U+00AC (decimal 172)
   defining Unicode char U+00AE (decimal 174)
   defining Unicode char U+00AF (decimal 175)
   defining Unicode char U+00B0 (decimal 176)
   defining Unicode char U+00B1 (decimal 177)
   defining Unicode char U+00B2 (decimal 178)
   defining Unicode char U+00B3 (decimal 179)
   defining Unicode char U+00B4 (decimal 180)
   defining Unicode char U+00B5 (decimal 181)
   defining Unicode char U+00B6 (decimal 182)
   defining Unicode char U+00B7 (decimal 183)
   defining Unicode char U+00B9 (decimal 185)
   defining Unicode char U+00BA (decimal 186)
   defining Unicode char U+00BC (decimal 188)
   defining Unicode char U+00BD (decimal 189)
   defining Unicode char U+00BE (decimal 190)
   defining Unicode char U+00D7 (decimal 215)
   defining Unicode char U+00F7 (decimal 247)
   defining Unicode char U+0192 (decimal 402)
   defining Unicode char U+02C7 (decimal 711)
   defining Unicode char U+02D8 (decimal 728)
   defining Unicode char U+02DD (decimal 733)
   defining Unicode char U+0E3F (decimal 3647)
   defining Unicode char U+2016 (decimal 8214)
   defining Unicode char U+2020 (decimal 8224)
   defining Unicode char U+2021 (decimal 8225)
   defining Unicode char U+2022 (decimal 8226)
   defining Unicode char U+2030 (decimal 8240)
   defining Unicode char U+2031 (decimal 8241)
   defining Unicode char U+203B (decimal 8251)
   defining Unicode char U+203D (decimal 8253)
   defining Unicode char U+2044 (decimal 8260)
   defining Unicode char U+204E (decimal 8270)
   defining Unicode char U+2052 (decimal 8274)
   defining Unicode char U+20A1 (decimal 8353)
   defining Unicode char U+20A4 (decimal 8356)
   defining Unicode char U+20A6 (decimal 8358)
   defining Unicode char U+20A9 (decimal 8361)
   defining Unicode char U+20AB (decimal 8363)
   defining Unicode char U+20AC (decimal 8364)
   defining Unicode char U+20B1 (decimal 8369)
   defining Unicode char U+2103 (decimal 8451)
   defining Unicode char U+2116 (decimal 8470)
   defining Unicode char U+2117 (decimal 8471)
   defining Unicode char U+211E (decimal 8478)
   defining Unicode char U+2120 (decimal 8480)
   defining Unicode char U+2122 (decimal 8482)
   defining Unicode char U+2126 (decimal 8486)
   defining Unicode char U+2127 (decimal 8487)
   defining Unicode char U+212E (decimal 8494)
   defining Unicode char U+2190 (decimal 8592)
   defining Unicode char U+2191 (decimal 8593)
   defining Unicode char U+2192 (decimal 8594)
   defining Unicode char U+2193 (decimal 8595)
   defining Unicode char U+2329 (decimal 9001)
   defining Unicode char U+232A (decimal 9002)
   defining Unicode char U+2422 (decimal 9250)
   defining Unicode char U+25E6 (decimal 9702)
   defining Unicode char U+25EF (decimal 9711)
   defining Unicode char U+266A (decimal 9834)
)
(c:/texlive/2017/texmf-dist/tex/latex/beamer/translator/dicts/translator-basic-
dictionary/translator-basic-dictionary-English.dict
Dictionary: translator-basic-dictionary, Language: English 
)
(c:/texlive/2017/texmf-dist/tex/latex/siunitx/siunitx-abbreviations.cfg
File: siunitx-abbreviations.cfg 2017/05/19 v2.7g siunitx: Abbreviated units
)
Package epstopdf Info: Source file: <Definitions/sensors-logo.eps>
(epstopdf)                    date: 2020-08-27 16:57:20
(epstopdf)                    size: 250782 bytes
(epstopdf)             Output file: <Definitions/sensors-logo-eps-converted-to.
pdf>
(epstopdf)                    date: 2020-08-27 16:57:25
(epstopdf)                    size: 14319 bytes
(epstopdf)             Command: <repstopdf --outfile=Definitions/sensors-logo-e
ps-converted-to.pdf Definitions/sensors-logo.eps>
(epstopdf)             \includegraphics on input line 146.
Package epstopdf Info: Output file is already uptodate.

<Definitions/sensors-logo-eps-converted-to.pdf, id=31, 185.69376pt x 54.2025pt>
File: Definitions/sensors-logo-eps-converted-to.pdf Graphic file (type pdf)
<use Definitions/sensors-logo-eps-converted-to.pdf>
Package pdftex.def Info: Definitions/sensors-logo-eps-converted-to.pdf used on 
input line 146.
(pdftex.def)             Requested size: 116.97635pt x 34.14322pt.
Package epstopdf Info: Source file: <Definitions/logo-mdpi.eps>
(epstopdf)                    date: 2020-09-17 13:23:26
(epstopdf)                    size: 736786 bytes
(epstopdf)             Output file: <Definitions/logo-mdpi-eps-converted-to.pdf
>
(epstopdf)                    date: 2020-09-17 13:23:26
(epstopdf)                    size: 43952 bytes
(epstopdf)             Command: <repstopdf --outfile=Definitions/logo-mdpi-eps-
converted-to.pdf Definitions/logo-mdpi.eps>
(epstopdf)             \includegraphics on input line 146.
Package epstopdf Info: Output file is already uptodate.


pdfTeX warning: pdflatex.exe (file ./Definitions/logo-mdpi-eps-converted-to.pdf
): PDF inclusion: found PDF version <1.7>, but at most version <1.5> allowed
<Definitions/logo-mdpi-eps-converted-to.pdf, id=33, 88.33pt x 58.2175pt>
File: Definitions/logo-mdpi-eps-converted-to.pdf Graphic file (type pdf)

<use Definitions/logo-mdpi-eps-converted-to.pdf>
Package pdftex.def Info: Definitions/logo-mdpi-eps-converted-to.pdf used on inp
ut line 146.
(pdftex.def)             Requested size: 43.16885pt x 28.45274pt.
LaTeX Font Info:    Font shape `T1/ppl/bx/n' in size <18> not available
(Font)              Font shape `T1/ppl/b/n' tried instead on input line 146.
LaTeX Font Info:    Try loading font information for OT1+ppl on input line 146.


(c:/texlive/2017/texmf-dist/tex/latex/psnfss/ot1ppl.fd
File: ot1ppl.fd 2001/06/04 font definitions for OT1/ppl.
)
LaTeX Font Info:    Try loading font information for OML+zplm on input line 146
.

(c:/texlive/2017/texmf-dist/tex/latex/psnfss/omlzplm.fd
File: omlzplm.fd 2002/09/08 Fontinst v1.914 font definitions for OML/zplm.
)
LaTeX Font Info:    Try loading font information for OMS+zplm on input line 146
.

(c:/texlive/2017/texmf-dist/tex/latex/psnfss/omszplm.fd
File: omszplm.fd 2002/09/08 Fontinst v1.914 font definitions for OMS/zplm.
)
LaTeX Font Info:    Try loading font information for OMX+zplm on input line 146
.

(c:/texlive/2017/texmf-dist/tex/latex/psnfss/omxzplm.fd
File: omxzplm.fd 2002/09/08 Fontinst v1.914 font definitions for OMX/zplm.
)
LaTeX Font Info:    Try loading font information for OT1+zplm on input line 146
.

(c:/texlive/2017/texmf-dist/tex/latex/psnfss/ot1zplm.fd
File: ot1zplm.fd 2002/09/08 Fontinst v1.914 font definitions for OT1/zplm.
)
Package microtype Info: Loading generic settings for font family
(microtype)             `zplm' (encoding: OT1).
(microtype)             For optimal results, create family-specific settings.
(microtype)             See the microtype manual for details.
LaTeX Font Info:    Font shape `U/msb/m/n' will be
(Font)              scaled to size 10.42007pt on input line 146.

(c:/texlive/2017/texmf-dist/tex/latex/microtype/mt-msb.cfg
File: mt-msb.cfg 2005/06/01 v1.0 microtype config. file: AMS symbols (b) (RS)
)
LaTeX Font Info:    Font shape `U/msb/m/n' will be
(Font)              scaled to size 7.91925pt on input line 146.
LaTeX Font Info:    Font shape `U/msb/m/n' will be
(Font)              scaled to size 6.25204pt on input line 146.
LaTeX Font Info:    Font shape `T1/ppl/bx/n' in size <10> not available
(Font)              Font shape `T1/ppl/b/n' tried instead on input line 146.
Package epstopdf Info: Source file: <Definitions/logo-orcid.eps>
(epstopdf)                    date: 2020-09-17 13:23:26
(epstopdf)                    size: 284378 bytes
(epstopdf)             Output file: <Definitions/logo-orcid-eps-converted-to.pd
f>
(epstopdf)                    date: 2020-09-17 13:23:26
(epstopdf)                    size: 12397 bytes
(epstopdf)             Command: <repstopdf --outfile=Definitions/logo-orcid-eps
-converted-to.pdf Definitions/logo-orcid.eps>
(epstopdf)             \includegraphics on input line 146.
Package epstopdf Info: Output file is already uptodate.


pdfTeX warning: pdflatex.exe (file ./Definitions/logo-orcid-eps-converted-to.pd
f): PDF inclusion: found PDF version <1.7>, but at most version <1.5> allowed
<Definitions/logo-orcid-eps-converted-to.pdf, id=35, 102.3825pt x 102.3825pt>
File: Definitions/logo-orcid-eps-converted-to.pdf Graphic file (type pdf)

<use Definitions/logo-orcid-eps-converted-to.pdf>
Package pdftex.def Info: Definitions/logo-orcid-eps-converted-to.pdf used on in
put line 146.
(pdftex.def)             Requested size: 9.10509pt x 9.10466pt.
Package epstopdf Info: Source file: <Definitions/logo-orcid.eps>
(epstopdf)                    date: 2020-09-17 13:23:26
(epstopdf)                    size: 284378 bytes
(epstopdf)             Output file: <Definitions/logo-orcid-eps-converted-to.pd
f>
(epstopdf)                    date: 2020-09-17 13:23:26
(epstopdf)                    size: 12397 bytes
(epstopdf)             Command: <repstopdf --outfile=Definitions/logo-orcid-eps
-converted-to.pdf Definitions/logo-orcid.eps>
(epstopdf)             \includegraphics on input line 146.
Package epstopdf Info: Output file is already uptodate.
File: Definitions/logo-orcid-eps-converted-to.pdf Graphic file (type pdf)

<use Definitions/logo-orcid-eps-converted-to.pdf>
Package pdftex.def Info: Definitions/logo-orcid-eps-converted-to.pdf used on in
put line 146.
(pdftex.def)             Requested size: 9.10509pt x 9.10466pt.
Package epstopdf Info: Source file: <Definitions/logo-orcid.eps>
(epstopdf)                    date: 2020-09-17 13:23:26
(epstopdf)                    size: 284378 bytes
(epstopdf)             Output file: <Definitions/logo-orcid-eps-converted-to.pd
f>
(epstopdf)                    date: 2020-09-17 13:23:26
(epstopdf)                    size: 12397 bytes
(epstopdf)             Command: <repstopdf --outfile=Definitions/logo-orcid-eps
-converted-to.pdf Definitions/logo-orcid.eps>
(epstopdf)             \includegraphics on input line 146.
Package epstopdf Info: Output file is already uptodate.
File: Definitions/logo-orcid-eps-converted-to.pdf Graphic file (type pdf)

<use Definitions/logo-orcid-eps-converted-to.pdf>
Package pdftex.def Info: Definitions/logo-orcid-eps-converted-to.pdf used on in
put line 146.
(pdftex.def)             Requested size: 9.10509pt x 9.10466pt.
Package epstopdf Info: Source file: <Definitions/logo-orcid.eps>
(epstopdf)                    date: 2020-09-17 13:23:26
(epstopdf)                    size: 284378 bytes
(epstopdf)             Output file: <Definitions/logo-orcid-eps-converted-to.pd
f>
(epstopdf)                    date: 2020-09-17 13:23:26
(epstopdf)                    size: 12397 bytes
(epstopdf)             Command: <repstopdf --outfile=Definitions/logo-orcid-eps
-converted-to.pdf Definitions/logo-orcid.eps>
(epstopdf)             \includegraphics on input line 146.
Package epstopdf Info: Output file is already uptodate.
File: Definitions/logo-orcid-eps-converted-to.pdf Graphic file (type pdf)

<use Definitions/logo-orcid-eps-converted-to.pdf>
Package pdftex.def Info: Definitions/logo-orcid-eps-converted-to.pdf used on in
put line 146.
(pdftex.def)             Requested size: 9.10509pt x 9.10466pt.
Package epstopdf Info: Source file: <Definitions/logo-orcid.eps>
(epstopdf)                    date: 2020-09-17 13:23:26
(epstopdf)                    size: 284378 bytes
(epstopdf)             Output file: <Definitions/logo-orcid-eps-converted-to.pd
f>
(epstopdf)                    date: 2020-09-17 13:23:26
(epstopdf)                    size: 12397 bytes
(epstopdf)             Command: <repstopdf --outfile=Definitions/logo-orcid-eps
-converted-to.pdf Definitions/logo-orcid.eps>
(epstopdf)             \includegraphics on input line 146.
Package epstopdf Info: Output file is already uptodate.
File: Definitions/logo-orcid-eps-converted-to.pdf Graphic file (type pdf)

<use Definitions/logo-orcid-eps-converted-to.pdf>
Package pdftex.def Info: Definitions/logo-orcid-eps-converted-to.pdf used on in
put line 146.
(pdftex.def)             Requested size: 9.10509pt x 9.10466pt.
Package epstopdf Info: Source file: <Definitions/logo-orcid.eps>
(epstopdf)                    date: 2020-09-17 13:23:26
(epstopdf)                    size: 284378 bytes
(epstopdf)             Output file: <Definitions/logo-orcid-eps-converted-to.pd
f>
(epstopdf)                    date: 2020-09-17 13:23:26
(epstopdf)                    size: 12397 bytes
(epstopdf)             Command: <repstopdf --outfile=Definitions/logo-orcid-eps
-converted-to.pdf Definitions/logo-orcid.eps>
(epstopdf)             \includegraphics on input line 146.
Package epstopdf Info: Output file is already uptodate.
File: Definitions/logo-orcid-eps-converted-to.pdf Graphic file (type pdf)

<use Definitions/logo-orcid-eps-converted-to.pdf>
Package pdftex.def Info: Definitions/logo-orcid-eps-converted-to.pdf used on in
put line 146.
(pdftex.def)             Requested size: 9.10509pt x 9.10466pt.
LaTeX Font Info:    Font shape `U/msb/m/n' will be
(Font)              scaled to size 9.37807pt on input line 146.
LaTeX Font Info:    Font shape `U/msb/m/n' will be
(Font)              scaled to size 7.29405pt on input line 146.
LaTeX Font Info:    Font shape `U/msb/m/n' will be
(Font)              scaled to size 5.21004pt on input line 146.
LaTeX Font Info:    Font shape `T1/ppl/bx/n' in size <9> not available
(Font)              Font shape `T1/ppl/b/n' tried instead on input line 146.
\c__siunitx_mathsf_int=\count310
Package microtype Info: Loading generic settings for font family
(microtype)             `cmss' (encoding: OT1).
(microtype)             For optimal results, create family-specific settings.
(microtype)             See the microtype manual for details.
\c__siunitx_mathtt_int=\count311
Package microtype Info: Loading generic settings for font family
(microtype)             `cmtt' (encoding: OT1).
(microtype)             For optimal results, create family-specific settings.
(microtype)             See the microtype manual for details.
LaTeX Font Info:    Font shape `T1/ppl/bx/n' in size <8> not available
(Font)              Font shape `T1/ppl/b/n' tried instead on input line 241.
 [1

{c:/texlive/2017/texmf-var/fonts/map/pdftex/updmap/pdftex.map} <./Definitions/s
ensors-logo-eps-converted-to.pdf> <./Definitions/logo-mdpi-eps-converted-to.pdf
> <./Definitions/logo-orcid-eps-converted-to.pdf>]
Underfull \hbox (badness 1205) in paragraph at lines 253--254
[]\T1/ppl/m/n/10 (+20) To im-prove the ac-cu-racy and re-duce vari-abil-ity, ou
r units that do not share a global
 []

<imm/positioning2.pdf, id=99, 381.45152pt x 194.10309pt>
File: imm/positioning2.pdf Graphic file (type pdf)

<use imm/positioning2.pdf>
Package pdftex.def Info: imm/positioning2.pdf used on input line 262.
(pdftex.def)             Requested size: 355.0919pt x 180.69466pt.
 [2 <./imm/positioning2.pdf>] [3]
Underfull \hbox (badness 1325) in paragraph at lines 374--374
\T1/ppl/b/n/9 Author Con-tri-bu-tions: \T1/ppl/m/n/9 (+20) In-ves-ti-ga-tion, M
.C., S.S., A.S.; Re-sources, P.B. and D.D.; Data cu-ra-tion, S.S.;
 []

[4] [5]
Package epstopdf Info: Source file: <Definitions/logo-ccby.eps>
(epstopdf)                    date: 2020-08-27 16:57:10
(epstopdf)                    size: 484140 bytes
(epstopdf)             Output file: <Definitions/logo-ccby-eps-converted-to.pdf
>
(epstopdf)                    date: 2020-08-27 16:57:15
(epstopdf)                    size: 11987 bytes
(epstopdf)             Command: <repstopdf --outfile=Definitions/logo-ccby-eps-
converted-to.pdf Definitions/logo-ccby.eps>
(epstopdf)             \includegraphics on input line 555.
Package epstopdf Info: Output file is already uptodate.

<Definitions/logo-ccby-eps-converted-to.pdf, id=512, 120.45pt x 42.1575pt>
File: Definitions/logo-ccby-eps-converted-to.pdf Graphic file (type pdf)

<use Definitions/logo-ccby-eps-converted-to.pdf>
Package pdftex.def Info: Definitions/logo-ccby-eps-converted-to.pdf used on inp
ut line 555.
(pdftex.def)             Requested size: 83.4452pt x 29.2064pt.
LaTeX Font Info:    Try loading font information for OMS+ppl on input line 555.


(c:/texlive/2017/texmf-dist/tex/latex/psnfss/omsppl.fd
File: omsppl.fd 
)
LaTeX Font Info:    Font shape `OMS/ppl/m/n' in size <9> not available
(Font)              Font shape `OMS/cmsy/m/n' tried instead on input line 555.


AED: lastpage setting LastPage

Underfull \hbox (badness 10000) in paragraph at lines 555--555

 []

[6 <./Definitions/logo-ccby-eps-converted-to.pdf>]
Package atveryend Info: Empty hook `BeforeClearDocument' on input line 555.
Package atveryend Info: Empty hook `AfterLastShipout' on input line 555.
 (./supplementary-xml.aux)
Package atveryend Info: Executing hook `AtVeryEndDocument' on input line 555.
Package atveryend Info: Executing hook `AtEndAfterFileList' on input line 555.
Package rerunfilecheck Info: File `supplementary-xml.out' has not changed.
(rerunfilecheck)             Checksum: 81121BCE4BECEEEF8EA3834AABA91604;1161.


LaTeX Font Warning: Size substitutions with differences
(Font)              up to 0.43996pt have occurred.

 ) 
Here is how much of TeX's memory you used:
 35942 strings out of 492995
 663425 string characters out of 6136402
 711870 words of memory out of 5000000
 38658 multiletter control sequences out of 15000+600000
 77328 words of font info for 307 fonts, out of 8000000 for 9000
 1141 hyphenation exceptions out of 8191
 62i,13n,56p,10386b,894s stack positions out of 5000i,500n,10000p,200000b,80000s
{c:/texlive/2017/texmf-dist/fonts/enc/dvips/base/8r.enc}<c:/texlive/2017/texm
f-dist/fonts/type1/public/amsfonts/cm/cmbsy10.pfb><c:/texlive/2017/texmf-dist/f
onts/type1/public/amsfonts/cm/cmex10.pfb><c:/texlive/2017/texmf-dist/fonts/type
1/public/amsfonts/cm/cmr10.pfb><c:/texlive/2017/texmf-dist/fonts/type1/public/a
msfonts/cm/cmsy10.pfb><c:/texlive/2017/texmf-dist/fonts/type1/public/amsfonts/c
m/cmsy9.pfb><c:/texlive/2017/texmf-dist/fonts/type1/public/mathpazo/fplmbi.pfb>
<c:/texlive/2017/texmf-dist/fonts/type1/public/mathpazo/fplmri.pfb><c:/texlive/
2017/texmf-dist/fonts/type1/urw/palatino/uplb8a.pfb><c:/texlive/2017/texmf-dist
/fonts/type1/urw/palatino/uplr8a.pfb><c:/texlive/2017/texmf-dist/fonts/type1/ur
w/palatino/uplri8a.pfb>
Output written on supplementary-xml.pdf (6 pages, 291511 bytes).
PDF statistics:
 570 PDF objects out of 1000 (max. 8388607)
 414 compressed objects within 5 object streams
 46 named destinations out of 1000 (max. 500000)
 73302 words of extra memory for PDF output out of 74296 (max. 10000000)
