# Supplementary material for: Assessing the Feasibility of Augmenting Fall Detection Systems by Relying on UWB-Based Position Tracking and a Home Robot
Source: Sensors (Basel). 2020 Sep 18;20(18):5361. doi: 10.3390/s20185361 (PMC7570467; doi:10.3390/s20185361)
Supplement: Supplementary file 1 [file sensors-20-05361-s001.zip › sensors-882124 Supplementary Materials xml/supplementary-xml.out]

\BOOKMARK [1][]{section.1}{\376\377\000S\000u\000p\000p\000l\000e\000m\000e\000n\000t\000a\000r\000y\000\040\000M\000a\000t\000e\000r\000i\000a\000l\000s}{}% 1
\BOOKMARK [2][]{subsection.1.1}{\376\377\000U\000l\000t\000r\000a\000-\000W\000i\000d\000e\000\040\000B\000a\000n\000d\000\040\000\050\000U\000W\000B\000\051}{section.1}% 2
\BOOKMARK [2][]{subsection.1.2}{\376\377\000L\000o\000c\000a\000l\000i\000z\000a\000t\000i\000o\000n\000\040\000P\000r\000o\000b\000l\000e\000m}{section.1}% 3
\BOOKMARK [2][]{subsection.1.3}{\376\377\000T\000a\000y\000l\000o\000r\000\040\000S\000e\000r\000i\000e\000s\000-\000B\000a\000s\000e\000d\000\040\000L\000e\000a\000s\000t\000\040\000S\000q\000u\000a\000r\000e\000\040\000A\000l\000g\000o\000r\000i\000t\000h\000m\000\040\000\050\000T\000S\000L\000S\000\051}{section.1}% 4
\BOOKMARK [3][]{subsubsection.1.3.1}{\376\377\000C\000a\000m\000e\000r\000a\000-\000b\000a\000s\000e\000d\000\040\000M\000o\000t\000i\000o\000n\000\040\000C\000a\000p\000t\000u\000r\000e\000\040\000S\000y\000s\000t\000e\000m}{subsection.1.3}% 5
\BOOKMARK [1][]{subsubsection.1.3.1}{\376\377\000R\000e\000f\000e\000r\000e\000n\000c\000e\000s}{}% 6
