# Supplementary material for: Assessing the Feasibility of Augmenting Fall Detection Systems by Relying on UWB-Based Position Tracking and a Home Robot
Source: Sensors (Basel). 2020 Sep 18;20(18):5361. doi: 10.3390/s20185361 (PMC7570467; doi:10.3390/s20185361)
Supplement: Supplementary file 1 [file sensors-20-05361-s001.zip › sensors-882124 Supplementary Materials xml/supplementary-xml.tex]

%  LaTeX support: latex@mdpi.com 
%  In case you need support, please attach all files that are necessary for compiling as well as the log file, and specify the details of your LaTeX setup (which operating system and LaTeX version / tools you are using).

%=================================================================
\documentclass[sensors,article,accept,moreauthors,pdftex]{Definitions/mdpi} 
\usepackage{graphicx}
\usepackage{wrapfig}   
\usepackage{subfigure}
%\usepackage{subfig}
\usepackage{siunitx}
\usepackage{url}
\usepackage{grffile} 
\usepackage{xcolor}
\usepackage{wrapfig}
\usepackage{subfigure}
% If you would like to post an early version of this manuscript as a preprint, you may use preprint as the journal and change 'submit' to 'accept'. The document class line would be, e.g., \documentclass[preprints,article,accept,moreauthors,pdftex]{mdpi}. This is especially recommended for submission to arXiv, where line numbers should be removed before posting. For preprints.org, the editorial staff will make this change immediately prior to posting.

%--------------------
% Class Options:
%--------------------
%----------
% journal
%----------
% Choose between the following MDPI journals:
% biologics, jmp, eng, jor, nursrep, biophysica, gastroent, jox, adolescents, hygiene, taxonomy, business, nanomanufacturing, geography, compoundsacoustics, actuators, addictions, admsci, aerospace, agriculture, agriengineering, agronomy, ai, algorithms, allergies, analytica, animals, antibiotics, antibodies, antioxidants, applmech, applnano, applsci, arts, asc, asi, atmosphere, atoms, automation, axioms, batteries, bdcc, behavsci , beverages, bioengineering, biology, biomedicines, biomedinformatics, biomimetics, biomolecules, biosensors, bloods, brainsci, breath, buildings, cancers, carbon , catalysts, cells, ceramics, challenges, chemengineering, chemistry, chemosensors, chemproc, children, civileng, cleantechnol, climate, clockssleep, cmd, coatings, colloids, computation, computers, condensedmatter, cosmetics, cryptography, crystals, cyber, dairy, data, dentistry, dermatopathology, designs, diabetology, diagnostics, digital, diseases, diversity, drones, earth, econometrics, ecologies, economies, education, ejbc, ejihpe, electricity, electrochem, electronicmat, electronics, endocrines, energies, engproc, entropy, environments, environsciproc, epidemiologia, epigenomes, est, fermentation, fibers, fire, fishes, fluids, foods, forecasting, forests, fractalfract, fuels, futureinternet, futurephys, galaxies, games, gardens, gases, gastrointestdisord, gels, genealogy, genes, geohazards, geosciences, geriatrics, hazardousmatters, healthcare, hearts, heritage, highthroughput, horticulturae, humanities, hydrogen, hydrology, ijerph, ijfs, ijgi, ijms, ijtpp, immuno, informatics, information, infrastructures, inorganics, insects, instruments, inventions, iot, j, jcdd, jce, jcm, jcp, jcs, jdb, jfb, jfmk, jimaging, jintelligence, jlpea, jmmp, jmse, jne, jnt, jof, joitmc, journalmedia, jpm, jrfm, jsan, land, languages, laws, life, literature, livers, logistics, lubricants, machines, magnetochemistry, make, marinedrugs, materials, materproc, mathematics, mca, medicina, medicines, medsci, membranes, metabolites, metals, microarrays, micromachines, microorganisms, minerals, modelling, molbank, molecules, mps, mti, nanomaterials, ncrna, ijns, neurosci, neuroglia, nitrogen, notspecified, nutrients, obesities, oceans, ohbm, osteology, optics, organics, particles, pathogens, pharmaceuticals, pharmaceutics, pharmacy, philosophies, photonics, physics, plants, plasma, pollutants, polymers, polysaccharides, preprints , proceedings, processes, prosthesis, proteomes, psych, psychiatryint, publications, quantumrep, quaternary, qubs, radiation, reactions, recycling, religions, remotesensing, reprodmed, reports, resources, risks, robotics, safety, sci, scipharm, sensors, separations, sexes, signals, sinusitis, skins, smartcities, sna, societies, socsci, soilsystems, solids, sports, standards, stats, surfaces, surgeries, suschem, sustainability, world, symmetry, systems, technologies, telecom, test, tourismhosp, toxics, toxins, transplantology, tropicalmed, universe, urbansci, uro, vaccines, vehicles, vetsci, vibration, viruses, vision, water, wem, wevj, women

%---------
% article
%---------
% The default type of manuscript is "article", but can be replaced by: 
% abstract, addendum, article, benchmark, book, bookreview, briefreport, casereport, changes, comment, commentary, communication, conceptpaper, conferenceproceedings, correction, conferencereport, expressionofconcern, extendedabstract, meetingreport, creative, datadescriptor, discussion, editorial, essay, erratum, hypothesis, interestingimages, letter, meetingreport, newbookreceived, obituary, opinion, projectreport, reply, retraction, review, perspective, protocol, shortnote, supfile, technicalnote, viewpoint
% supfile = supplementary materials

%----------
% submit
%----------
% The class option "submit" will be changed to "accept" by the Editorial Office when the paper is accepted. This will only make changes to the frontpage (e.g., the logo of the journal will get visible), the headings, and the copyright information. Also, line numbering will be removed. Journal info and pagination for accepted papers will also be assigned by the Editorial Office.

%------------------
% moreauthors
%------------------
% If there is only one author the class option oneauthor should be used. Otherwise use the class option moreauthors.

%---------
% pdftex
%---------
% The option pdftex is for use with pdfLaTeX. If eps figures are used, remove the option pdftex and use LaTeX and dvi2pdf.

%=================================================================
\firstpage{1} 
\makeatletter 
\setcounter{page}{\@firstpage} 
\makeatother
\pubvolume{xx}
\issuenum{1}
\articlenumber{5}
\pubyear{2020}
\copyrightyear{2020}
%\externaleditor{Academic Editor: name}
\history{Received: 13 July 2020; Accepted: 19 August 2020; Published: date}
%\updates{yes} % If there is an update available, un-comment this line

%% MDPI internal command: uncomment if new journal that already uses continuous page numbers 
%\continuouspages{yes}

%------------------------------------------------------------------
% The following line should be uncommented if the LaTeX file is uploaded to arXiv.org
%\pdfoutput=1

%=================================================================
% Add packages and commands here. The following packages are loaded in our class file: fontenc, inputenc, calc, indentfirst, fancyhdr, graphicx,epstopdf, lastpage, ifthen, lineno, float, amsmath, setspace, enumitem, mathpazo, booktabs, titlesec, etoolbox, tabto, xcolor, soul, multirow, microtype, tikz, totcount, amsthm, hyphenat, natbib, hyperref, footmisc, url, geometry, newfloat, caption

%=================================================================
%% Please use the following mathematics environments: Theorem, Lemma, Corollary, Proposition, Characterization, Property, Problem, Example, ExamplesandDefinitions, Hypothesis, Remark, Definition, Notation, Assumption
%% For proofs, please use the proof environment (the amsthm package is loaded by the MDPI class).

%=================================================================
% Full title of the paper (Capitalized)
\Title{Supplementary Materials}

\newcommand{\orcidauthorA}{0000-0003-2500-2283} % Add \orcidA{} behind the author's name
\newcommand{\orcidauthorB}{0000-0002-9745-1515} % Add \orcidB{} behind the author's name
\newcommand{\orcidauthorC}{0000-0002-3069-0319} % Add \orcidB{} behind the author's name
\newcommand{\orcidauthorD}{0000-0002-6955-3098} % Add \orcidB{} behind the author's name
\newcommand{\orcidauthorE}{0000-0002-1818-1714} % Add \orcidB{} behind the author's name
\newcommand{\orcidauthorF}{0000-0001-5374-1679} % Add \orcidB{} behind the author's name

% Authors, for the paper (add full first names)
\Author{{Maurizio Capra} $^{1,*,\dagger }$\orcidA{}, Stefano Sapienza $^{2,*,\dagger}$, Paolo Motto Ros $^{1}$\orcidD{}, Alessio Serrani $^{1}$, Maurizio~Martina $^{1}$\orcidC{}, Alessandro Puiatti $^{3}$\orcidB{}, Paolo Bonato $^{2}$\orcidE{}, and Danilo Demarchi $^{1}$\orcidF}
%MDPI: Please carefully check the accuracy of names and affiliations. Changes will not be possible after proofreading.

% Authors, for metadata in PDF
\AuthorNames{Maurizio Capra, Stefano Sapienza, Paolo Motto Ros, Alessio Serrani,   Maurizio Martina, ,Alessandro Puiatti, Paolo Bonato, Danilo Demarchi}

% Affiliations / Addresses (Add [1] after \address if there is only one affiliation.)
\address{%
$^{1}$ \quad Department of Electrical, Electronics and Telecommunication Engineering, Politecnico di Torino, \mbox{10129 Torino TO}, Italy; paolo.mottoros@polito.it (P.M.R.); alessio.serrani@polito.it (A.S.); maurizio.martina@polito.it (M.M.); Danilo.demarchi@polito.it (D.D.)\\
$^{2}$ \quad Department of Physical Medicine and Rehabilitation, Harvard Medical School, Boston, {MA} 02129, USA;  pbonato@mgh.harvard.edu (P.B.)\\%Please add post code.
$^{3}$ \quad University of Applied Sciences and Arts of Southern Switzerland Lugano, {Swiss} 6928; alessandro.puiatti@supsi.ch (A.L.)}
%Please confirm the location city and coutry, add the post code, and please add the department.

% Contact information of the corresponding author
\corres{Correspondence: maurizio.capra@polito.it (M.C.); ssapienza@partners.org (S.S.)}

% Current address and/or shared authorship
%\firstnote{Current address: Affiliation 3} 
\firstnote{These authors contributed equally to this work.}
% The commands \thirdnote{} till \eighthnote{} are available for further notes

%\simplesumm{} % Simple summary

%\conference{} % An extended version of a conference paper

% Abstract (Do not insert blank lines, i.e. \\) 
%\abstract{A single paragraph of about 200 words maximum. For research articles, abstracts should give a pertinent overview of the work. We strongly encourage authors to use the following style of structured abstracts, but without headings: (1) Background: Place the question addressed in a broad context and highlight the purpose of the study; (2) Methods: Describe briefly the main methods or treatments applied; (3) Results: Summarize the article's main findings; and (4) Conclusion: Indicate the main conclusions or interpretations. The abstract should be an objective representation of the article, it must not contain results which are not presented and substantiated in the main text and should not exaggerate the main conclusions.}

% Keywords
%\keyword{keyword 1; keyword 2; keyword 3}  % List three to ten pertinent keywords specific to the article, yet reasonably common within the subject discipline.

% The fields PACS, MSC, and JEL may be left empty or commented out if not applicable
%\PACS{J0101}
%\MSC{}
%\JEL{}

%%%%%%%%%%%%%%%%%%%%%%%%%%%%%%%%%%%%%%%%%%
% Only for the journal Diversity
%\LSID{\url{http://}}

%%%%%%%%%%%%%%%%%%%%%%%%%%%%%%%%%%%%%%%%%%
% Only for the journal Applied Sciences:
%\featuredapplication{Authors are encouraged to provide a concise description of the specific application or a potential application of the work. This section is not mandatory.}
%%%%%%%%%%%%%%%%%%%%%%%%%%%%%%%%%%%%%%%%%%

%%%%%%%%%%%%%%%%%%%%%%%%%%%%%%%%%%%%%%%%%%
% Only for the journal Data:
%\dataset{DOI number or link to the deposited data set in cases where the data set is published or set to be published separately. If the data set is submitted and will be published as a supplement to this paper in the journal Data, this field will be filled by the editors of the journal. In this case, please make sure to submit the data set as a supplement when entering your manuscript into our manuscript editorial system.}

%\datasetlicense{license under which the data set is made available (CC0, CC-BY, CC-BY-SA, CC-BY-NC, etc.)}

%%%%%%%%%%%%%%%%%%%%%%%%%%%%%%%%%%%%%%%%%%
% Only for the journal Toxins
%\keycontribution{The breakthroughs or highlights of the manuscript. Authors can write one or two sentences to describe the most important part of the paper.}

%\setcounter{secnumdepth}{4}
%%%%%%%%%%%%%%%%%%%%%%%%%%%%%%%%%%%%%%%%%%
\begin{document}
%%%%%%%%%%%%%%%%%%%%%%%%%%%%%%%%%%%%%%%%%%


%%%%%%%%%%%%%%%%%%%%%%%%%%%%%%%%%%%%%%%%%%
\section{Supplementary Materials}\label{BG}


\vspace{-7pt}
\subsection{Ultra-Wide Band (UWB)}

UWB is a radio technology based on the transmission of high-frequency pulses (>\SI{500}{\mega\hertz}), particularly suitable for ranging and positioning systems \cite{uwb_pos}. 
\par Thanks to the reverse relationship existing between frequency and time domain, the broad bandwidth leads to a short lifetime of the UWB signal and, consequently, to high time resolution that is a crucial feature for positioning \cite{uwb_comp}.
Furthermore, the short-wavelength makes this technology low-power and particularly robust against the multipath in indoor environments~\cite{4575035}.
Conventional RF systems transmit information by modulating frequency, power, or phase typical of a sinusoidal wave, while UWB transmits data by generating radio energy at specific time intervals; this makes it suitable for time position and time modulation. 

%For any RF signal, Shannon's theory characterizes the capacity of the signal channel. It states that a direct relationship between capacity and bandwidth exists as well as an inverse relationship between bandwidth and power consumption:

%\begin{equation}\label{key}
%C = B\cdot log_2(1 + SNR)
%\end{equation}

%where \emph{C} is the channel capacity, \emph{B} the bandwidth and \emph{SNR} the signal to noise ratio. Thus, for a specific capacity is possible to consume less power by using a larger bandwidth. Thanks to such phenomena, UWB is considered one of the best low power technique.

%UWB has many important characteristics that make this technology suitable for ranging and consequently for positioning systems. The most important feature is the large bandwidth in comparison with the other RF systems.
%Thanks to the reverse relationship existing between frequency and time domain, the direct result of the large bandwidth is the short lifetime of a UWB signal. This means high time resolution that is an important characteristic for positioning since it makes the signal robust against multipath.
%High bandwidth means also high-speed communication. Furthermore, UWB allows the use of low carrier frequencies, where signals can more easily travel through objects.
%High time resolution and short-wavelength results in robust technology against multipath and fading.
%Last but not least, since UWB can be transmitted in base band without any modulation, the hardware can be simpler and cheaper.
%Conventional RF systems transmit information by modulating frequency, power or phase typically of a sinusoidal wave, while UWB transmits data by generating radio energy at specific time intervals, this makes it suitable for time position or time modulation. 

One of the most used UWB transmission methods is the Impulse Radio (IR) \cite{IR-1, IR-2, IR-3, ANALOGIRUWB}. In this method, information of the symbol is uttered by the position and/or polarity of the signal. %The UWB pulse can be generated from a Gaussian pulse:
The high time resolution enabled by the IR-UWB approach makes it a good candidate not only for indoor location/tracking systems
but also for short distance estimation~\cite{crepaldi}, and, more generally, for all architectures relying on a time-coded or quasi-digital approach~\cite{DSD2013, DATE2015},
which in turn allows for the design of very small and simple \cite{CROC, CADET} low-power read-out-circuits~\cite{BIOCAS2017}.

% \begin{equation}\label{pulse}
% pulse(t) = \pm \frac{\sqrt{2}}{\alpha}e^{-\frac{2\pi t^2}{\alpha^2}}
% \end{equation}

% where

% \begin{equation}\label{key}
% \alpha^2 = 4\pi\theta^2
% \end{equation}

% is the pulse factor, while \emph{$\theta$} is the variance.
% As stated in equation \ref{pulse}, $\alpha$ is responsible of the pulse width, greater its value, the narrower the width. Pulses of the duration of the order of fractions of nanoseconds are UWB signals.
% Here, an example of UWB transmission.
% \begin{figure}[H]
% 	\centering
% 	\includegraphics[width=1\textwidth]{imm/uwb_signal.pdf}
% 	\caption{Example of an IR UWB transmission.}
% 	\label{fig:UWB_signal}
% \end{figure}

% Figure \ref{fig:UWB_signal} shows an example of Impulse Radio UWB transmission in which each symbol is determined by the position of the signal in one of the chip intervals (\textit{Tc}) inside the related frame (\textit{Tf}).
% Impulse UWB is a good technology for location sensor networks, thanks to its high quality communication. The fine time resolution of some sub-nanosecond pulses allows an accuracy of a few centimeters in distance measurements.
\par The UWB technology is license-free, so anyone can implement a UWB system. However, since UWB covers a wide range of frequencies, regulation must be obeyed that is meant to avoid collisions and interference among different communication protocols. The Federal Communication Commission (FCC) \cite{fcc} is one of the most important U.S. organizations that issue regulatory requirements. The FCC was the first organization to design rules about UWB in 2002.
% The FCC limits the Equivalent Isotropically Radiated Power (EIRP) at \SI{-41}{\decibel m\per\mega\hertz}, and the spectrum from 3.1 to \SI{10.6}{\giga\hertz} is divided in 14 bands of \SI{500}{\mega\hertz} each as showed in Figure \ref{fig:UWB_channel}.
% \begin{figure}[H]
% 	\centering
% 	\includegraphics[width=1\textwidth]{imm/uwb_channel.pdf}
% 	\caption{FCC regulation for emitted signal power.}
% 	\label{fig:UWB_channel}
% \end{figure}
Many countries, as a result of these regulations, have allocated a frequency spectrum range for UWB use. 
%However, not all the 14 bands are available in all the countries. In fact, while U.S. permits to exploit all the frequencies with no constraints, Europe enables channel 3 and the first band of channel 4 without restriction and channel 1 and the second band of channel 4 with Detect and Avoid (DAA) restriction \cite{daa}.
%The \emph{DAA} is a technique to avoid interference between transmitter and wireless environment. Thanks to this UWB can be transmitted over the designed channel without interfering with other technologies that work on the same frequencies.

%\subsection{UWB regulation}

%UWB technology is license free, so anyone can implement an UWB system without the necessity of a patent. However, since UWB cover a wide range of frequency a regulation must exist to avoid collision and interference among different communication protocols.

%Federal Communication Commission (FCC) is one of the most important U.S. organizations that provides regulations. This was the first organization to design rules about UWB in 2002.
%The FCC limits the Equivalent Isotropically Radiated Power (EIRP) at \SI{-41}{\decibel m\per\mega\hertz}, and the spectrum from 3.1 to \SI{10.6}{\giga\hertz} is divided in 14 bands of \SI{500}{\mega\hertz} each as showed in Figure \ref{fig:UWB_channel}.

%\begin{figure}[H]
%	\centering
%	\includegraphics[width=1\textwidth]{imm/uwb_channel.pdf}
%	\caption{FCC regulation for emitted signal power.}
%	\label{fig:UWB_channel}
%\end{figure}

%Many countries, as result of the regulations, have allocated frequency spectrum for UWB use. However, not all the 14 bands are available in all the countries. In fact, while U.S. permits to exploit all the frequencies with no constraints, Europe enables channel 3 and the first band of channel 4 without restriction and channel 1 and the second band of channel 4 with Detect and Avoid (DAA) restriction.
%The \emph{DAA} is a technique to avoid interference between transmitter and wireless environment. Thanks to this UWB can be transmitted over the designed channel without interfering with other technologies that work on the same frequencies.


\subsection{Localization Problem}\label{loc_prob}
To locate an object in space, relative distances measured concerning fixed points (anchors or nodes) are needed.
A certain number of fixed nodes are necessary to find the position of a radio tag. While the object position in 2D can be estimated via the intersection among three circles, as shown in Figure~\ref{fig:pos}, in 3D, the position of the radio tag is derived from spheres built on the basis of at least four nodes. 
Generally, the positioning process consists of two main steps. First, range values (e.g., distance between anchors and the radio tag) are estimated. Then, the unknown position is found by solving a system of equations. Considering the 2D case (relative to three anchor units), three equations must be solved jointly as follows: 
\begin{equation}\label{key4}
d_i = \sqrt{(x_i - x)^2 + (y_i - y)^2} \quad i = 1,2,3,
\end{equation}
where \emph{x} and \emph{y} are the tag's coordinates in 2D, [\emph{x$_i$, y$_i$}] is the position of the \emph{i-th} anchor and \emph{d$_i$} is the \emph{i-th}~range.

One of the most used techniques to estimate the range value is the Time of Flight (ToF). The distance \emph{d} between two devices (anchor and radio tag) is obtained by measuring the propagation time \emph{$\tau$} of a signal that is traveling at a known speed \emph{c}:
\begin{equation}\label{key3}
d = \tau \cdot c
\end{equation}

The estimated range values are affected by errors. In our case, the ToF is represented by the elapsed time between the time when the signal is transmitted by the radio tag and the time when the anchor unit receives it. The main source of error is hence associated with the synchronization of the electronic boards utilized by different anchor and radio tag units. Even if the clock signal on each board is set at the same frequency, a small clock skews between the transmitter and the receiver can occur. Moreover, since the ToF is on the order of nanoseconds, even small variations can result in significant range variations.

This means that the intersection will not be perfect, or, better yet, the intersection will not result in a specific point, but rather in a delimited area or volume, as shown in Figure \ref{fig:pos} (left). The errors that affect the range measurements result in an uncertainty in the radio tag’s position that is a function of the accuracy of the ToF estimation.

To improve the accuracy and reduce variability, our units that do not share a global synchronization time axis adopt a process called Two Way Ranging (TWR). Such a technique requires two transceivers (tag and anchor) and a total of three messages to produce a range estimation, as depicted in Figure \ref{fig:pos} (right). 


\makeatletter 
\setcounter{figure}{0} 
\@addtoreset{figure}{section}
\renewcommand{\thefigure}{S\arabic{figure}}
\begin{figure}[t]
	\centering
	\includegraphics[width=0.8\textwidth]{imm/positioning2.pdf}
	\caption{Trilateration technique. (left) In the ideal case where the ranges have no uncertainty, and the intersection results in the tag coordinate (red dot). In the real case, the measurements are affected by uncertainty, and the intersection is represented by a surface of points (red area). (right) To minimize the error, the Two Way Ranging (TWR) protocol is applied where the anchor and tag exchange multiple~messages. }%Please add explanation of subfigures in caption.
	\label{fig:pos}
\end{figure}

Setting \emph{t$_{replyB}$} and \emph{t$_{replyA}$} to constant time values, when the node A receives the final response message from the node B, it can calculate the ToF by knowing the elapsed time from the poll request:

\begin{equation}\label{key}
\tau = ToF = \frac{t_{roundA} - t_{replyB}}{2} 
\end{equation}
where \emph{t$_{roundA}$} is:

\begin{equation}\label{key2}
t_{roundA} = 2ToF + t_{replyB}
\end{equation}
the round trip time with respect to node A.
By estimating the range (i.e., distance) value using two ToF, it is possible to mitigate the error due to the clock skew. Decawave \cite{DecaRange_TREK1000,DecaRangeRTLS_ARM} exploits the TWR approach but integrates all anchor units together, so the individual TWRs overlap to save time and be more efficient.

\subsection{Taylor Series-Based Least Square Algorithm (TSLS)}\label{TSLS}
In this subsection, we will provide some insight into the TSLS algorithm \cite{tsls} that is applied by the system to correct range values affected by the NLOS condition. 
Considering an architecture with N fixed anchors, whose coordinates are known ($x_i$, $y_i$, $z_i$ with \emph{i} = 1, 2, ..., N), and one tag T, whose coordinates need to be computed (\emph{x}, \emph{y}, \emph{z}), the Euclidean distance between A$_i$ and T can be expressed as:%MDPI: We change them into italic format, please confirm.

\begin{equation}\label{Eq:DistEuc} 
d_i(x,y,z) = \sqrt{(x-x_i)^{2}+(y-y_i)^{2}+(z-z_i)^{2}}
\end{equation}
where \textit{i}=1, 2, ..., N.
However, the range value r$_i$ measured by the anchor differs from d$_i$ by an error of $\epsilon_i$ that depends on the condition of LOS or NLOS of the transceivers. The state of the anchors can be predicted from the CIR values; consequently, we can define the error for each unit as follows:

\begin{equation}\label{Eq:Error}
\epsilon_{i} = \begin{cases} n_i, & \mbox{if } i\mbox{ is in LOS} \\ n_i+L_i & \mbox{if } i\mbox{ is in NLOS} \end{cases}
\end{equation}
where $n_i$ is the measurement error that can be modeled as a zero-mean Gaussian process, while $L_i$ is the distance due to the NLOS condition that can be considered as a Rayleigh distributed random variable.

In general, the coordinates $(\hat{x},\hat{y},\hat{z})$ can be expressed as the sum of two components: the true measure plus the error introduced by the obstacle that obstruct the LOS (Equation~(\ref{Eq:Coord})):

\begin{equation}\label{Eq:Coord} 
x=\hat{x}+\delta_x, y=\hat{y}+\delta_y, z=\hat{z}+\delta_z
\end{equation}
\textls[-20]{where $\delta_x$, $\delta_y$ and $\delta_z$ are the NLOS error added. Substituting Equation~(\ref{Eq:Coord}) in Equation~(\ref{Eq:DistEuc}), expanding~using} Taylor series around ($\hat{x}$, $\hat{y}$, and $\hat{z}$) and retaining only first two terms, the following equations can be obtained:

\begin{equation}\label{Eq:Coord2}
\begin{cases} a_{i,1}\delta_{x}+ a_{i,2}\delta_{y}+a_{i,3}\delta_{z} \simeq r_i-d_i, & \mbox{if } i\mbox{ is in LOS}
\\ a_{i,1}\delta_{x}+ a_{i,2}\delta_{y}+a_{i,3}\delta_{z} \simeq 0, & \mbox{if } i\mbox{ is in NLOS} \end{cases}
\end{equation}

It is possible to observe that in Equation~(\ref{Eq:Coord2}) the NLOS corrupted measurement are cancelled out by the estimated distance. This is possible thanks to the definition of \textit{$\hat{d}$} and the coefficient \textit{a} as follows:
\begin{equation}\label{Eq:DistEuc2} 
\hat{d_i} = \sqrt{(\hat{x}-x_i)^{2}+(\hat{y}-y_i)^{2}+(\hat{z}-z_i)^{2}},
a_{i,1}=\frac{\hat{x}-x_i}{\hat{d}_i}, a_{i,2}=\frac{\hat{y}-y_i}{\hat{d}_i},
a_{i,3}=\frac{\hat{z}-z_i}{\hat{d}_i} 
\end{equation}

Finally, introducing the matrix form:
\begin{equation}
\textbf{A}=
\begin{bmatrix}
a_{1,1}       & a_{1,2} & a_{1,3}  \\
a_{2,1}       & a_{2,2} & a_{2,3}  \\
\hdotsfor{3} \\
a_{N,1}       & a_{N,2} & a_{N,3}  \\   
\end{bmatrix}
\in R^{Nx3}
\end{equation}

\begin{equation}
\boldsymbol{\delta}=[\delta_{x}, \delta_{y}, \delta_{z}] ^{T} \in R^{3x1}  \\
\end{equation}

\begin{equation}
\textbf{h}=
[r_1-\hat{d}_1 \dots  r_{Nlos}-\hat{d}_{Nlos}]^{T} \in R^{Nx1}  \\
\end{equation}
we can apply a Least Square algorithm to the equation:
\begin{equation}
\textbf{A}\boldsymbol{\delta\simeq}\textbf{h}
\end{equation}
and compute the residuals $\delta_{x}$, $\delta_{y}$ as $\delta_{z}$ from:

\begin{equation}\label{Eq:FinalResidual}
\boldsymbol{\delta}\boldsymbol{\approx}\textbf{(A$^{T}$WA)$^{-1}$A$^{T}$Wh}
\end{equation}
where W is the diagonal matrix of the weights associated with the anchor units. Intuitively, the higher is the weight of a unit, the more reliable is the range value derived from data collected using such unit; in our case, we empirically selected values of 0.1 for the anchor units in NLOS and 1 for the anchor units in LOS. From Equation~(\ref{Eq:FinalResidual}), it is possible to compute $\delta_{x}$, $\delta_{y}$, and $\delta_{z}$ and update the coordinates of the tag:

\begin{equation}\label{Eq:Correction}
\begin{cases} \hat{x}=\hat{x}+\delta_{x}
\\ \hat{y}=\hat{y}+\delta_{y}
\\ \hat{z}=\hat{z}+\delta_{z}
\end{cases}
\end{equation}

this process is carried out as an iterative procedure until a stopping condition is reached. %For our tracking system, where short latency is necessary, a threshold on the number of iteration has been selected as criteria to stop the TSLS.  
Two approaches are possible: setting a threshold on the number of iterations or on the minimum improvement achieved during the iterative process. {In our analysis, since all the measures were gathered done off line and computational power was not a concern, we stopped the algorithm after reaching the iteration number 20. However, in a real case scenario, this} decision must be taken considering the hardware computational power, to achieve a good trade-off between accuracy and sampling frequency. 


\subsubsection{Camera-based Motion Capture System}

A camera-based motion capture system (Vicon \cite{vicon} by Oxford Metrics Group, Cambridge UK) was used in the study to monitor the position of the robot during the dynamic tests of the UWB-based position tracking system. This system relies on small reflective markers and infrared cameras that enable tracking the 3D coordinates of the reflective markers with sub-millimeter accuracy.


% is a motion capture system capable of tracking the position of small reflective markers with an accuracy of less than 1~mm. 
% Initially developed for gait analysis, it has been extensively used for a different type of positioning problem that ranges from biomechanics to 3D character animation.  The~platform used in this study is based on 12 cameras specifically made to record the markers' movements with a sampling frequency that can reach 240 Hz and a resolution of 12 Megapixels. All the information is transmitted to a computer, which merges the data received, providing the markers' coordinates' final estimates.
% In this manuscript, Vicon has been used to monitor the robot's position during the dynamic tests to get a reliable real-time position of the device while it was moving across different trajectories.

%%%%%%%%%%%%%%%%%%%%%%%%%%%%%%%%%%%%%%%%%%
 
%\begin{listing}[H]
%\caption{Title of the listing}
%\rule{\textwidth}{1pt}
%\raggedright Text of the listing. In font size footnotesize, small, or normalsize. Preferred format: left aligned and single spaced. Preferred border format: top border line and bottom border 


%%%%%%%%%%%%%%%%%%%%%%%%%%%%%%%%%%%%%%%%%%
\authorcontributions{Investigation, M.C., S.S., A.S.; Resources, P.B. and D.D.; Data curation, S.S.; writing---original draft preparation, M.C.; writing---review and editing, M.C., S.S., P.B. and D.D.; visualization, M.C. and S.S.; supervision, P.M.R., M.M., A.P., P.B. and D.D. All authors have read and agreed to the published version of the manuscript}%Please carefully confirm.

\funding{No external funding supported this research study}%Please add funding information.

\acknowledgments{The authors would like to thank Edoardo Bonizzoni for his contribution to testing the WSN system and gathering measures to evaluate the robustness of the alarm transmission.}

\conflictsofinterest{The authors declare to have no conflicts of interest.}

%%%%%%%%%%%%%%%%%%%%%%%%%%%%%%%%%%%%%%%%%%

%%%%%%%%%%%%%%%%%%%%%%%%%%%%%%%%%%%%%%%%%%
\reftitle{References}

% Please provide either the correct journal abbreviation (e.g. according to the “List of Title Word Abbreviations” http://www.issn.org/services/online-services/access-to-the-ltwa/) or the full name of the journal.
% Citations and References in Supplementary files are permitted provided that they also appear in the reference list here. 

%=====================================
% References, variant A: external bibliography
%=====================================
%\externalbibliography{yes}
%\bibliography{your_external_BibTeX_file}

%=====================================
% References, variant B: internal bibliography
%=====================================
\externalbibliography{yes}
\begin{thebibliography}{999}
\bibitem[Yavari and Nickerson(March 27, 2014)]{uwb_pos}
Yavari, M.; Nickerson, B.G.
\newblock \emph{Ultra Wideband Wireless Positioning Systems}; Technical Report; University of New Brunswick: Fredericton, NB, Canada, 2014.
%Newly added publisher and its location please confirm.

\bibitem[{Wang} \em{et~al.}(2015){Wang}, {Raja}, and {Pang}]{uwb_comp}
{Wang}, J.; {Raja}, A.K.; {Pang}, Z.
\newblock Prototyping and Experimental Comparison of IR-UWB Based High
Precision Localization Technologies.
\newblock In Proceedings of the 2015 IEEE 12th Intl Conf on Ubiquitous Intelligence and Computing
and 2015 IEEE 12th Intl Conf on Autonomic and Trusted Computing and 2015 IEEE
15th Intl Conf on Scalable Computing and Communications and Its Associated
Workshops (UIC-ATC-ScalCom), Beijing, China, 10--14 August 2015; pp. 1187--1192.
%Newly added conference location and date please confirm.

\bibitem[{Sani} \em{et~al.}(2008){Sani}, {Alomainy}, {Santas}, and {Yang
	Hao}]{4575035}
{Sani}, A.; {Alomainy}, A.; {Santas}, J.; {Yang, H}.
\newblock Time domain characterisation of ultra wideband wearable antennas and
radio propagation for body-centric wireless networks in healthcare
applications.
\newblock In~Proceedings of the 2008 5th International Summer School and Symposium on Medical
Devices and Biosensors, Hong~Kong, China, 1--3 June 2008; pp. 129--132.
%Newly added conference location and date please confirm.

\bibitem[{Bunin}(2010)]{IR-1}
{Bunin}, S.G.
\newblock Data rate in impulse ultra wideband radio networks.
\newblock In Proceedings of the 2010 5th International Confernce on Ultrawideband and Ultrashort
Impulse Signals, Sevastopol, Ukraine, 6--10 September 2010; pp.~141--143.
%Newly added conference location and date please confirm.

\bibitem[{Gentner} \em{et~al.}(2010){Gentner}, {Hilton}, {Beach}, and
{Mecklenbräuker}]{IR-2}
{Gentner}, P.K.; {Hilton}, G.; {Beach}, M.A.; {Mecklenbräuker}, C.F.
\newblock Near and farfield analysis of ultra wideband impulse radio
beamforming in the time domain.
\newblock In Proceedings of the 2010 IEEE International Conference on Ultra-Wideband, Nanjing, China, 20--23 September 2010; Volume~2, pp. 1--4.
%Newly added conference location and date please confirm.


\bibitem[{Sereewattanapong} and {Promwong}(2010)]{IR-3}
{Sereewattanapong}, T.; {Promwong}, S.
\newblock Performance evaluation scheme of ultra wideband impulse radio
transmission.
\newblock In Proceedings of the ECTI-CON2010: The 2010 ECTI International Confernce on Electrical
Engineering/Electronics, Computer, Telecommunications and Information
Technology, Chiang~Mai, Thailand, 19--21 May 2010; pp. 405--409.
%Newly added conference location and date please confirm.

\bibitem[{Crepaldi} \em{et~al.}(2015){Crepaldi}, {Stoppa}, {Motto Ros}, and
{Demarchi}]{ANALOGIRUWB}
{Crepaldi}, M.; {Stoppa}, M.; {Motto Ros}, P.; {Demarchi}, D.
\newblock An Analog-Mode Impulse Radio System for Ultra-Low Power Short-Range
Audio Streaming.
\newblock {\em IEEE Trans. Circuits Syst. I Regul. Pap. }
{\bf 2015}, {\em 62},~2886--2897.

\bibitem[{Crepaldi} \em{et~al.}(2014){Crepaldi}, {Ros}, {Bonanno}, {Morello},
and {Demarchi}]{crepaldi}
{Crepaldi}, M.; {Ros}, P.M.; {Bonanno}, A.; {Morello}, M.; {Demarchi}, D.
\newblock A non-coherent IR-UWB receiver for high sensitivity short distance
estimation.
\newblock In Proceedings of the 2014 IEEE International Symposium on Circuits and Systems (ISCAS), Melbourne VIC, Australia, 
1--5 June 2014; pp. 1905--1908.
%Newly added conference location and date please confirm.

\bibitem[{Motto Ros} \em{et~al.}(2013){Motto Ros}, {Crepaldi}, {Bonanno}, and
{Demarchi}]{DSD2013}
{Motto Ros}, P.; {Crepaldi}, M.; {Bonanno}, A.; {Demarchi}, D.
\newblock Wireless Multi-channel Quasi-digital Tactile Sensing Glove-Based
System.
\newblock In Proceedings of the 2013 Euromicro Conference on Digital System Design, Los~Alamitos, CA, USA, 4--6 September 2013; pp. 673--680.
%Newly added conference location and date please confirm.

\bibitem[{Shahshahani} \em{et~al.}(2015){Shahshahani}, {Shahshahani}, {Motto
	Ros}, {Bonanno}, {Crepaldi}, {Martina}, {Demarchi}, and {Masera}]{DATE2015}
{Shahshahani}, A.; {Shahshahani}, M.; {Motto Ros}, P.; {Bonanno}, A.;
{Crepaldi}, M.; {Martina}, M.; {Demarchi}, D.; {Masera}, G.
\newblock An all-digital spike-based ultra-low-power {IR-UWB} dynamic average
threshold crossing scheme for muscle force wireless transmission.
\newblock In Proceedings of the 2015 Design, Automation Test in Europe Conference Exhibition (DATE), Grenoble, France, 9--13 March 2015; pp. 1479--1484.
%Newly added conference location and date please confirm.

\bibitem[{Damilano} \em{et~al.}(2017){Damilano}, {Motto Ros}, {Sanginario},
{Chiolerio}, {Bocchini}, {Roppolo}, {Pirri}, {Carrara}, {Demarchi}, and
{Crepaldi}]{CROC}
{Damilano}, A.; {Motto Ros}, P.; {Sanginario}, A.; {Chiolerio}, A.; {Bocchini},
S.; {Roppolo}, I.; {Pirri}, C.F.; {Carrara},~S.; {Demarchi}, D.; {Crepaldi},
M.
\newblock A Robust Capacitive Digital Read-Out Circuit for a Scalable Tactile
Skin.
\newblock {\em IEEE~Sens. J. } {\bf 2017}, {\em 17},~2682--2695.

\bibitem[{Stoppa} \em{et~al.}(2016){Stoppa}, {Ros}, {Crepaldi}, {Chiolerio},
and {Demarche}]{CADET}
{Stoppa}, M.; {Ros}, P.M.; {Crepaldi}, M.; {Chiolerio}, A.; {Demarche}, D.
\newblock A quasi-digital pressure/touch sensor prototype for orbital targets
contact event monitoring.
\newblock In Proceedings of the 2016 IEEE International Symposium on Circuits and Systems (ISCAS), Montreal, QC, Canada, 
22--25 May 2016; pp. 2843--2846.
%Newly added conference location and date please confirm.

\bibitem[{Motto Ros} \em{et~al.}(2017){Motto Ros}, {Miccoli}, {Sanginario}, and
{Demarchi}]{BIOCAS2017}
{Motto Ros}, P.; {Miccoli}, B.; {Sanginario}, A.; {Demarchi}, D.
\newblock Low-power architecture for integrated CMOS bio-sensing.
\newblock In Proceedings of the 2017 IEEE Biomedical Circuits and Systems Conference (BioCAS), Turin, Italy, 19--21 October 2017; pp. 1--4.
%Newly added conference location and date please confirm.

\bibitem[fcc(2004)]{fcc}
Federal Communications Commission.
\newblock {\em Bell Labs Technical Journal}; Federal Communications Commission: Washington, DC, USA, 2004, Volume 9.

\bibitem[Dec(2016)]{DecaRange_TREK1000}
Decawave.
\newblock {\em TREK1000 Quick Start Guide, Two Way Ranging(TWR) Evaluation
	Kit}, 1.3 edition; Decawave: Dublin, Ireland, 2016.
%Newly added publisher lcoation, please confirm.

\bibitem[Dec(2015)]{DecaRangeRTLS_ARM}
Decawave.
\newblock {\em Source Code Guide, DecaRangeRTLS ARM Source Code, Understanding
	and Using the DecaRangeRTLS ARM Source Code}, 2.2 edition; Decawave: Dublin, Ireland, 2015.
%Newly added publisher lcoation, please confirm.

\bibitem[{Yu} \em{et~al.}(2008){Yu}, {Guo}, and {Oppermann}]{tsls}
{Yu}, K.; {Guo}, Y.J.; {Oppermann}, I.
\newblock Modified Taylor Series Expansion Based Positioning Algorithms.
\newblock In~Proceedings of the VTC Spring 2008 - IEEE Vehicular Technology Conference, Singapore, 11--14 May 2008; pp. 2656--2660.
%Newly added conference location and date please confirm.


\bibitem[Vicon((accessed August 7, 2020))]{vicon}
Vicon. Available online: \url{https://www.vicon.com/} (accessed on 7 August 2020).
\end{thebibliography}

% The following MDPI journals use author-date citation: Arts, Econometrics, Economies, Genealogy, Humanities, IJFS, JRFM, Laws, Religions, Risks, Social Sciences. For those journals, please follow the formatting guidelines on http://www.mdpi.com/authors/references
% To cite two works by the same author: \citeauthor{ref-journal-1a} (\citeyear{ref-journal-1a}, \citeyear{ref-journal-1b}). This produces: Whittaker (1967, 1975)
% To cite two works by the same author with specific pages: \citeauthor{ref-journal-3a} (\citeyear{ref-journal-3a}, p. 328; \citeyear{ref-journal-3b}, p.475). This produces: Wong (1999, p. 328; 2000, p. 475)


%%%%%%%%%%%%%%%%%%%%%%%%%%%%%%%%%%%%%%%%%%
%% optional
%\sampleavailability{Samples of the compounds ...... are available from the authors.}

%% for journal Sci
%\reviewreports{\\
%Reviewer 1 comments and authors’ response\\
%Reviewer 2 comments and authors’ response\\
%Reviewer 3 comments and authors’ response
%}

%%%%%%%%%%%%%%%%%%%%%%%%%%%%%%%%%%%%%%%%%%
\end{document}
