# Supplementary figures and images for: Assessing the Feasibility of Augmenting Fall Detection Systems by Relying on UWB-Based Position Tracking and a Home Robot
Source: MDPI journal article supplement (doi:10.3390/s20185361), 2020-09-18

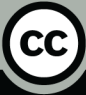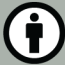

BY

Supplement: s1 [file s1]

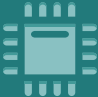

*sensors*

Supplement: s1 [file s1]

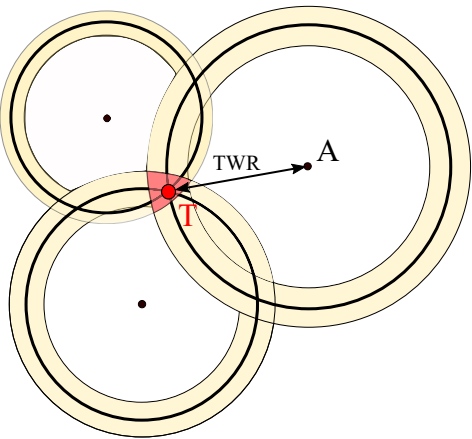

## Two Way Ranging (TWR)

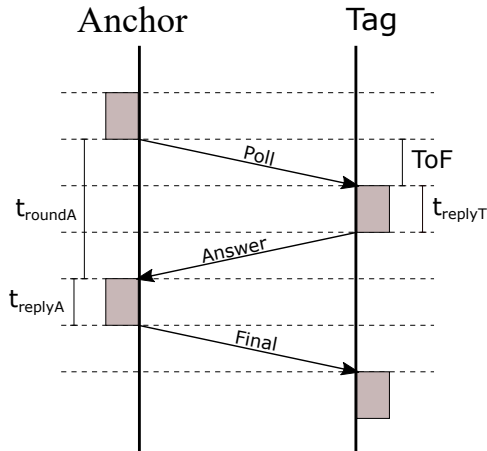

Supplement: s1 [file s1]

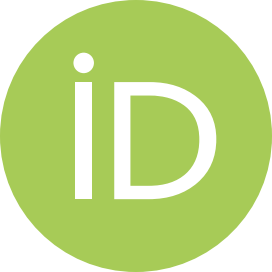

Supplement: s1 [file s1]
